# Supplementary material
Source: Research Square preprint supplement (doi:10.21203/rs.3.rs-9458638/v1)
Supplement: Supplementary file 1 [file ae6ea8ac2a3dea637a91fa9a.xlsx]

## Sheet: Data
k	sk	Binom	GBD	SSBk	SSGk		ϴ=	-0.533535
0	0	0.00658513	9.30766e-08	4.33639e-05	8.66326e-15		n=	12
1	0	0.0971091	0.000171729	0.00943017	2.9491e-08			-0.830859	Sample p
2	0	0.656352	0.0160251	0.430797	0.000256803		p=	0.546192	0.551347
3	0	2.68862	0.382423	7.22868	0.146248
4	3	7.43406	3.48051	19.6609	0.230891		SSB=	197.783
5	14	14.6171	14.3773	0.380764	0.142391		SSG=	2.30234
6	30	20.9566	29.3278	81.783	0.451801		F=	85.9052
7	30	22.0744	30.5635	62.8157	0.317508		p-value=	1.02059e-09
8	16	16.9544	16.1975	0.910873	0.0390247
9	5	9.26006	4.16911	18.1481	0.690373
10	1	3.41389	0.467529	5.82685	0.283526
11	0	0.762782	0.0179045	0.581837	0.00032057
12	0	0.0781148	0.00011109	0.00610193	1.23409e-08
13		0	0	0	0
14		0	0	0	0
15		0	0	0	0
16		0	0	0	0
17		0	0	0	0
18		0	0	0	0
19		0	0	0	0
20		0	0	0	0
21		0	0	0	0
22		0	0	0	0
23		0	0	0	0
24		0	0	0	0
25		0	0	0	0
26		0	0	0	0
27		0	0	0	0
28		0	0	0	0
29		0	0	0	0
30		0	0	0	0
31		0	0	0	0
32		0	0	0	0
33		0	0	0	0
34		0	0	0	0
35		0	0	0	0
36		0	0	0	0
37		0	0	0	0
38		0	0	0	0
39		0	0	0	0
40		0	0	0	0
41		0	0	0	0
42		0	0	0	0
43		0	0	0	0
44		0	0	0	0
45		0	0	0	0
46		0	0	0	0
47		0	0	0	0
48		0	0	0	0
49		0	0	0	0
50		0	0	0	0
51		0	0	0	0
52		0	0	0	0
53		0	0	0	0
54		0	0	0	0
55		0	0	0	0
56		0	0	0	0
57		0	0	0	0
58		0	0	0	0
59		0	0	0	0
60		0	0	0	0
61		0	0	0	0
62		0	0	0	0
63		0	0	0	0
64		0	0	0	0
65		0	0	0	0
66		0	0	0	0
67		0	0	0	0
68		0	0	0	0
69		0	0	0	0
70		0	0	0	0
71		0	0	0	0
72		0	0	0	0
73		0	0	0	0
74		0	0	0	0
75		0	0	0	0
76		0	0	0	0
77		0	0	0	0
78		0	0	0	0
79		0	0	0	0
80		0	0	0	0
81		0	0	0	0
82		0	0	0	0
83		0	0	0	0
84		0	0	0	0
85		0	0	0	0
86		0	0	0	0
87		0	0	0	0
88		0	0	0	0
89		0	0	0	0
90		0	0	0	0
91		0	0	0	0
92		0	0	0	0
93		0	0	0	0
94		0	0	0	0
95		0	0	0	0
96		0	0	0	0
97		0	0	0	0
98		0	0	0	0
99		0	0	0	0
100		0	0	0	0
101		0	0	0	0
102		0	0	0	0
103		0	0	0	0
104		0	0	0	0
105		0	0	0	0
106		0	0	0	0
107		0	0	0	0
108		0	0	0	0
109		0	0	0	0
110		0	0	0	0
111		0	0	0	0
112		0	0	0	0
113		0	0	0	0
114		0	0	0	0
115		0	0	0	0
116		0	0	0	0
117		0	0	0	0
118		0	0	0	0
119		0	0	0	0
120		0	0	0	0
121		0	0	0	0
122		0	0	0	0
123		0	0	0	0
124		0	0	0	0
125		0	0	0	0
126		0	0	0	0
127		0	0	0	0
128		0	0	0	0
129		0	0	0	0
130		0	0	0	0
131		0	0	0	0
132		0	0	0	0
133		0	0	0	0
134		0	0	0	0
135		0	0	0	0
136		0	0	0	0
137		0	0	0	0
138		0	0	0	0
139		0	0	0	0
140		0	0	0	0
141		0	0	0	0
142		0	0	0	0
143		0	0	0	0
144		0	0	0	0
145		0	0	0	0
146		0	0	0	0
147		0	0	0	0
148		0	0	0	0
149		0	0	0	0
150		0	0	0	0
151		0	0	0	0
152		0	0	0	0
153		0	0	0	0
154		0	0	0	0
155		0	0	0	0
156		0	0	0	0
157		0	0	0	0
158		0	0	0	0
159		0	0	0	0
160		0	0	0	0
161		0	0	0	0
162		0	0	0	0
163		0	0	0	0
164		0	0	0	0
165		0	0	0	0
166		0	0	0	0
167		0	0	0	0
168		0	0	0	0
169		0	0	0	0
170		0	0	0	0
171		0	0	0	0
172		0	0	0	0
173		0	0	0	0
174		0	0	0	0
175		0	0	0	0
176		0	0	0	0
177		0	0	0	0
178		0	0	0	0
179		0	0	0	0
180		0	0	0	0
181		0	0	0	0
182		0	0	0	0
183		0	0	0	0
184		0	0	0	0
185		0	0	0	0
186		0	0	0	0
187		0	0	0	0
188		0	0	0	0
189		0	0	0	0
190		0	0	0	0
191		0	0	0	0
192		0	0	0	0
193		0	0	0	0
194		0	0	0	0
195		0	0	0	0
196		0	0	0	0
197		0	0	0	0
198		0	0	0	0
199		0	0	0	0
200		0	0	0	0

## Sheet: Calc
Theta=	-0.533535				1	2	3	4	5	6	7	8	9	10	11	12	13	14	15	16	17	18	19	20	21	22	23	24	25	26	27	28	29	30	31	32	33	34	35	36	37	38	39	40	41	42	43	44	45
n=	12		1
		0	9.40168e-10		0.453808	0.0736967	0.0119681	0.00194357	0.000315628	5.12568e-05	8.3239e-06	1.35177e-06	2.19522e-07	3.56495e-08	5.78935e-09	9.40168e-10	1.5268e-10	2.47946e-11	4.02654e-12	6.53895e-13	1.0619e-13	1.72449e-14	2.8005e-15	4.5479e-16	7.38562e-17	1.1994e-17	1.94777e-18	3.16311e-19	5.13676e-20	8.34191e-21	1.35469e-21	2.19997e-22	3.57267e-23	5.80187e-24	9.42202e-25	1.5301e-25	2.48482e-26	4.03526e-27	6.5531e-28	1.0642e-28	1.72822e-29	2.80656e-30	4.55774e-31	7.40159e-32	1.20199e-32	1.95199e-33	3.16995e-34	5.14788e-35	8.35995e-36
p=	0.546192	1	1.73464e-06		0.546192	0.760223	0.387989	0.142034	0.0436388	0.0120077	0.00306069	0.000737301	0.000170039	3.78778e-05	8.20197e-06	1.73464e-06	3.5961e-07	7.32861e-08	1.4715e-08	2.91644e-09	5.71417e-10	1.10819e-10	2.12957e-11	4.05869e-12	7.67768e-13	1.44251e-13	2.69341e-14	5.00042e-15	9.23477e-16	1.6972e-16	3.10517e-17	5.65741e-18	1.02673e-18	1.85656e-19	3.34564e-20	6.0098e-21	1.0763e-21	1.92209e-22	3.42335e-23	6.08179e-24	1.07788e-24	1.90601e-25	3.36314e-26	5.92208e-27	1.04078e-27	1.82572e-28	3.19698e-29	5.58872e-30	9.75397e-31
		2	0.000161869			0.16608	0.549543	0.54069	0.332068	0.15669	0.0623023	0.0219453	0.00705937	0.00211574	0.000599058	0.000161869	4.20566e-05	1.05684e-05	2.58037e-06	6.14407e-07	1.43099e-07	3.26815e-08	7.3343e-09	1.62021e-09	3.52851e-10	7.58545e-11	1.6115e-11	3.38659e-12	7.04619e-13	1.45256e-13	2.96892e-14	6.02016e-15	1.21171e-15	2.42203e-16	4.81e-17	9.49438e-18	1.86338e-18	3.63744e-19	7.06444e-20	1.36543e-20	2.62714e-21	5.0329e-22	9.60222e-23	1.82486e-23	3.45519e-24	6.51893e-25	1.22578e-25	2.29744e-26	4.29273e-27
		3	0.00386286			0	0.0504998	0.299977	0.477397	0.437625	0.29119	0.156559	0.0722024	0.0296422	0.0111047	0.00386286	0.00126375	0.000392599	0.000116689	3.3379e-05	9.23344e-06	2.47971e-06	6.48634e-07	1.65709e-07	4.1443e-08	1.01666e-08	2.45053e-09	5.81244e-10	1.35842e-10	3.13175e-11	7.12951e-12	1.60415e-12	3.57021e-13	7.86543e-14	1.71639e-14	3.71219e-15	7.96162e-16	1.6941e-16	3.57801e-17	7.50386e-18	1.56326e-18	3.23618e-19	6.65929e-20	1.36253e-20	2.77271e-21	5.61326e-22	1.13079e-22	2.26723e-23	4.52534e-24
		4	0.0351567			0	0	0.0153554	0.141912	0.330663	0.421124	0.374099	0.26036	0.151656	0.0770777	0.0351567	0.0146821	0.0056975	0.00207773	0.000718313	0.000237082	7.51285e-05	2.29646e-05	6.79746e-06	1.95476e-06	5.47652e-07	1.49838e-07	4.01185e-08	1.05306e-08	2.71417e-09	6.87859e-10	1.71625e-10	4.22042e-11	1.0239e-11	2.45284e-12	5.80683e-13	1.35951e-13	3.14983e-14	7.22623e-15	1.64247e-15	3.7005e-16	8.26808e-17	1.8328e-17	4.03237e-18	8.8085e-19	1.91111e-19	4.11953e-20	8.82504e-21	1.87936e-21
		5	0.145226			0	0	0	0.0046691	0.0615434	0.196708	0.331254	0.377803	0.329678	0.236148	0.145226	0.0790636	0.0389514	0.0176514	0.00745044	0.00295798	0.00111336	0.000399829	0.000137724	4.57042e-05	1.46667e-05	4.56587e-06	1.38266e-06	4.08261e-07	1.17786e-07	3.32638e-08	9.21024e-09	2.50388e-09	6.69193e-10	1.76029e-10	4.562e-11	1.16593e-11	2.94102e-12	7.32771e-13	1.80463e-13	4.39575e-14	1.05964e-14	2.52932e-15	5.98111e-16	1.40182e-16	3.2578e-17	7.51014e-18	1.718e-18	3.90121e-19
		6	0.296241			0	0	0	0	0.00141973	0.0251741	0.105399	0.226292	0.321704	0.34342	0.296241	0.216493	0.138468	0.0793522	0.041467	0.0200289	0.00903764	0.00384252	0.00155018	0.000596853	0.000220386	7.83646e-05	2.6928e-05	8.96918e-06	2.90345e-06	9.15563e-07	2.81811e-07	8.48213e-08	2.50047e-08	7.22986e-09	2.05299e-09	5.73181e-10	1.57508e-10	4.26412e-11	1.13828e-11	2.99849e-12	7.8002e-13	2.00515e-13	5.09671e-14	1.28169e-14	3.19042e-15	7.86502e-16	1.92102e-16	4.65078e-17
		7	0.308722			0	0	0	0	0	0.000431696	0.00987384	0.0523203	0.139261	0.241102	0.308722	0.315323	0.26982	0.200117	0.131855	0.0786268	0.043047	0.021885	0.010427	0.00469072	0.00200492	0.000818476	0.000320553	0.000120902	4.40598e-05	1.55585e-05	5.33709e-06	1.78243e-06	5.80692e-07	1.84869e-07	5.76035e-08	1.75917e-08	5.27226e-09	1.55243e-09	4.49579e-10	1.28173e-10	3.60045e-11	9.97325e-12	2.72617e-12	7.35871e-13	1.96269e-13	5.17551e-14	1.35002e-14	3.48522e-15
		8	0.163612			0	0	0	0	0	0	0.000131265	0.00375218	0.0245011	0.0790719	0.163612	0.247268	0.294868	0.291807	0.248216	0.186189	0.125568	0.0772922	0.0439444	0.0233013	0.0116148	0.00547859	0.00245906	0.00105529	0.000434752	0.000172549	6.61782e-05	2.45937e-05	8.87709e-06	3.1187e-06	1.06844e-06	3.5755e-07	1.17055e-07	3.7541e-08	1.18093e-08	3.64787e-09	1.10763e-09	3.30907e-10	9.73522e-11	2.82267e-11	8.07176e-12	2.27806e-12	6.3493e-13	1.74864e-13
		9	0.0421123			0	0	0	0	0	0	0	3.99137e-05	0.00139114	0.0109584	0.0421123	0.102537	0.180453	0.248282	0.281185	0.271741	0.230091	0.174148	0.11967	0.0755951	0.044343	0.0243548	0.012612	0.00619387	0.00289928	0.00129906	0.000559245	0.000232069	9.30931e-05	3.6191e-05	1.3666e-05	5.02239e-06	1.79966e-06	6.29775e-07	2.15541e-07	7.22441e-08	2.37426e-08	7.65924e-09	2.42782e-09	7.56871e-10	2.3226e-10	7.02128e-11	2.09249e-11	6.15194e-12
		10	0.00472251			0	0	0	0	0	0	0	0	1.21365e-05	0.000505669	0.00472251	0.0212887	0.0602055	0.121977	0.191676	0.246178	0.268095	0.254348	0.214583	0.163595	0.114164	0.0736899	0.044376	0.025112	0.0134357	0.00683198	0.00331659	0.00154309	0.000690442	0.000297991	0.000124387	5.0335e-05	1.97882e-05	7.57197e-06	2.82502e-06	1.02924e-06	3.66696e-07	1.27922e-07	4.37467e-08	1.46815e-08	4.84004e-09	1.56883e-09	5.004e-10	1.57184e-10
		11	0.000180853			0	0	0	0	0	0	0	0	0	3.69034e-06	0.000180853	0.00197373	0.010306	0.0334782	0.0773176	0.137549	0.198761	0.242176	0.255754	0.239075	0.201103	0.154244	0.109036	0.0716747	0.0441404	0.0256286	0.0141052	0.00739315	0.00370542	0.00178216	0.000825124	0.000368775	0.000159495	6.6902e-05	2.7271e-05	1.08221e-05	4.18774e-06	1.5825e-06	5.84782e-07	2.11574e-07	7.50311e-08	2.61084e-08	8.92274e-09	2.99763e-09
		12	1.12212e-06			0	0	0	0	0	0	0	0	0	0	1.12212e-06	6.38137e-05	0.000803948	0.0048102	0.0177771	0.0464015	0.0927366	0.149723	0.202809	0.23703	0.244193	0.225518	0.189237	0.145879	0.104258	0.069613	0.0437078	0.0259502	0.0146397	0.00788051	0.00406267	0.0020124	0.00096054	0.000442926	0.000197772	8.56864e-05	3.60902e-05	1.48025e-05	5.92127e-06	2.31337e-06	8.8386e-07	3.30632e-07	1.21227e-07	4.36101e-08
		13	0			0	0	0	0	0	0	0	0	0	0	0	3.41201e-07	2.22602e-05	0.000320375	0.00217608	0.00907337	0.0265661	0.059242	0.106203	0.159028	0.204622	0.231213	0.233392	0.213375	0.178679	0.138337	0.0998033	0.0675459	0.0431311	0.0261141	0.0150568	0.00829877	0.00438709	0.00223108	0.00109443	0.00051907	0.000238543	0.000106427	4.61795e-05	1.95188e-05	8.04819e-06	3.24168e-06	1.27703e-06	4.92591e-07
		14	0			0	0	0	0	0	0	0	0	0	0	0	0	1.03749e-07	7.68917e-06	0.000125285	0.000958205	0.00447461	0.0145986	0.0361049	0.0714729	0.117707	0.16596	0.204788	0.225033	0.223305	0.202413	0.169203	0.131489	0.0956423	0.0655002	0.0424498	0.0261505	0.0153727	0.00865339	0.00467866	0.00243639	0.00122499	0.000595987	0.000281149	0.000128831	5.74395e-05	2.49554e-05	1.058e-05	4.38256e-06
		15	0			0	0	0	0	0	0	0	0	0	0	0	0	0	3.15468e-08	2.63349e-06	4.81956e-05	0.000412094	0.00214126	0.00773834	0.0211106	0.0459172	0.0827881	0.127363	0.170949	0.203739	0.218687	0.21388	0.192452	0.160632	0.125234	0.0917492	0.0634931	0.0416937	0.0260839	0.0156016	0.00895007	0.00493821	0.00262723	0.00135083	0.000672627	0.000324965	0.000152591	6.97476e-05	3.10787e-05
		16	0			0	0	0	0	0	0	0	0	0	0	0	0	0	0	9.59239e-09	8.95254e-07	1.82749e-05	0.000173584	0.000997782	0.00397307	0.0118974	0.0283055	0.0556393	0.0930353	0.13534	0.174355	0.201793	0.212307	0.205062	0.183346	0.152829	0.119492	0.0880998	0.0615356	0.0408855	0.0259343	0.0157559	0.00919443	0.00516713	0.00280305	0.00147093	0.00074811	0.000369419	0.000177399
		17	0			0	0	0	0	0	0	0	0	0	0	0	0	0	0	0	2.91675e-09	3.02346e-07	6.84165e-06	7.17818e-05	0.000454075	0.00198266	0.0064882	0.0168154	0.035899	0.0650128	0.102163	0.141825	0.176474	0.199187	0.205978	0.196799	0.174981	0.145686	0.114196	0.0846723	0.0596342	0.0400421	0.0257179	0.0158464	0.00939185	0.00536711	0.00296373	0.00158455	0.000821716
		18	0			0	0	0	0	0	0	0	0	0	0	0	0	0	0	0	0	8.86893e-10	1.01513e-07	2.53237e-06	2.91986e-05	0.000202311	0.000964446	0.00343523	0.00966223	0.0223257	0.0436473	0.0738655	0.110182	0.147002	0.177549	0.196099	0.199757	0.189044	0.16726	0.139115	0.109292	0.0814474	0.0577926	0.0391768	0.0254479	0.0158824	0.00954734	0.00554004	0.00310946
		19	0			0	0	0	0	0	0	0	0	0	0	0	0	0	0	0	0	0	2.69677e-10	3.39052e-08	9.27815e-07	1.17024e-05	8.84345e-05	0.000458459	0.00177085	0.00538706	0.0134288	0.0282569	0.0513541	0.0820919	0.117142	0.151041	0.177778	0.192665	0.193678	0.181752	0.160107	0.133042	0.104733	0.0784074	0.0560125	0.0382997	0.0251353	0.015872	0.00966549
		20	0			0	0	0	0	0	0	0	0	0	0	0	0	0	0	0	0	0	0	8.20003e-11	1.12711e-08	3.36822e-07	4.62782e-06	3.79945e-05	0.000213425	0.000890969	0.00292221	0.00783562	0.0176965	0.0344486	0.0588685	0.0896358	0.123111	0.154098	0.177321	0.188987	0.187765	0.174884	0.153454	0.127409	0.100483	0.0755371	0.0542941	0.0374184	0.0247889
		21	0			0	0	0	0	0	0	0	0	0	0	0	0	0	0	0	0	0	0	0	2.49337e-11	3.73089e-09	1.2126e-07	1.808e-06	1.60692e-05	9.74812e-05	0.000438454	0.00154591	0.00444667	0.0107513	0.0223625	0.040759	0.0660796	0.0964765	0.12817	0.156308	0.176311	0.185144	0.18203	0.168404	0.147249	0.122165	0.0965076	0.0728224	0.0526369
		22	0			0	0	0	0	0	0	0	0	0	0	0	0	0	0	0	0	0	0	0	0	7.58158e-12	1.2302e-09	4.33248e-08	6.98559e-07	6.69931e-06	4.37552e-05	0.000211432	0.000799234	0.00245985	0.00635188	0.0140851	0.0273227	0.0470685	0.0729097	0.102617	0.1324	0.157792	0.174853	0.181195	0.176481	0.162281	0.141443	0.117268	0.09278
		23	0			0	0	0	0	0	0	0	0	0	0	0	0	0	0	0	0	0	0	0	0	0	2.30532e-12	4.04208e-10	1.53723e-08	2.67177e-07	2.75644e-06	1.93282e-05	0.000100072	0.000404548	0.00132911	0.00365727	0.00862766	0.0177766	0.0324782	0.0532796	0.0793082	0.108079	0.13588	0.158653	0.173036	0.177187	0.171118	0.156486	0.135996
		24	0			0	0	0	0	0	0	0	0	0	0	0	0	0	0	0	0	0	0	0	0	0	0	7.00977e-13	1.32381e-10	5.41969e-09	1.01237e-07	1.12047e-06	8.41294e-06	4.65565e-05	0.000200805	0.000702698	0.00205616	0.00515005	0.0112497	0.0217594	0.037739	0.059315	0.0852454	0.112891	0.138689	0.158982	0.170931	0.173155	0.165941
		25	0			0	0	0	0	0	0	0	0	0	0	0	0	0	0	0	0	0	0	0	0	0	0	0	2.13145e-13	4.32265e-11	1.89958e-09	3.80315e-08	4.50397e-07	3.61231e-06	2.1317e-05	9.78847e-05	0.000364094	0.0011307	0.00300133	0.00693827	0.0141836	0.0259662	0.0430264	0.0651161	0.0907075	0.117092	0.140896	0.158858	0.168599
		26	0			0	0	0	0	0	0	0	0	0	0	0	0	0	0	0	0	0	0	0	0	0	0	0	0	6.48109e-14	1.4076e-11	6.62196e-10	1.41739e-08	1.79179e-07	1.53156e-06	9.61719e-06	4.69187e-05	0.000185144	0.000609103	0.00171046	0.00417768	0.00901181	0.0173883	0.0303322	0.0482729	0.0706394	0.0956931	0.120721	0.142567
		27	0			0	0	0	0	0	0	0	0	0	0	0	0	0	0	0	0	0	0	0	0	0	0	0	0	0	1.9707e-14	4.57193e-12	2.29684e-10	5.24353e-09	7.05984e-08	6.41767e-07	4.2795e-06	2.21396e-05	9.2515e-05	0.000321877	0.000954665	0.00245968	0.00559045	0.0113525	0.0208193	0.0347968	0.0534225	0.0758548	0.10021
		28	0			0	0	0	0	0	0	0	0	0	0	0	0	0	0	0	0	0	0	0	0	0	0	0	0	0	0	5.99228e-15	1.48147e-12	7.92948e-11	1.92652e-09	2.75683e-08	2.65989e-07	1.88001e-06	1.02952e-05	4.54794e-05	0.000167064	0.000522529	0.00141808	0.00339112	0.00723764	0.0139359	0.0244311	0.0393051	0.0584297
		29	0			0	0	0	0	0	0	0	0	0	0	0	0	0	0	0	0	0	0	0	0	0	0	0	0	0	0	0	1.82207e-15	4.78992e-13	2.72564e-11	7.03296e-10	1.06755e-08	1.0912e-07	8.16039e-07	4.72231e-06	2.20176e-05	8.52633e-05	0.000280813	0.000801601	0.00201417	0.00451232	0.00911101	0.0167337	0.0281791
		30	0			0	0	0	0	0	0	0	0	0	0	0	0	0	0	0	0	0	0	0	0	0	0	0	0	0	0	0	0	5.54034e-16	1.54551e-13	9.33092e-12	2.55211e-10	4.10171e-09	4.43388e-08	3.50247e-07	2.13842e-06	1.05071e-05	4.28321e-05	0.000148337	0.000444801	0.00117285	0.00275467	0.00582576	0.0111972
		31	0			0	0	0	0	0	0	0	0	0	0	0	0	0	0	0	0	0	0	0	0	0	0	0	0	0	0	0	0	0	1.68465e-16	4.97713e-14	3.1822e-12	9.2092e-11	1.56442e-09	1.78549e-08	1.48747e-07	9.56724e-07	4.94687e-06	2.11988e-05	7.70987e-05	0.000242543	0.000670317	0.00164863	0.00364787
		32	0			0	0	0	0	0	0	0	0	0	0	0	0	0	0	0	0	0	0	0	0	0	0	0	0	0	0	0	0	0	0	5.12249e-17	1.59994e-14	1.08138e-12	3.30563e-11	5.92575e-10	7.12946e-09	6.25463e-08	4.23198e-07	2.29958e-06	1.03457e-05	3.94645e-05	0.000130093	0.000376408	0.000968362
		33	0			0	0	0	0	0	0	0	0	0	0	0	0	0	0	0	0	0	0	0	0	0	0	0	0	0	0	0	0	0	0	0	1.55759e-17	5.13444e-15	3.66246e-13	1.18068e-11	2.23004e-10	2.82421e-09	2.60546e-08	1.85202e-07	1.05621e-06	4.98256e-06	1.9911e-05	6.86993e-05	0.000207872
		34	0			0	0	0	0	0	0	0	0	0	0	0	0	0	0	0	0	0	0	0	0	0	0	0	0	0	0	0	0	0	0	0	0	4.73615e-18	1.64509e-15	1.2365e-13	4.19743e-12	8.3411e-11	1.11038e-09	1.07578e-08	8.02319e-08	4.79643e-07	2.36975e-06	9.9094e-06	3.57473e-05
		35	0			0	0	0	0	0	0	0	0	0	0	0	0	0	0	0	0	0	0	0	0	0	0	0	0	0	0	0	0	0	0	0	0	0	1.44012e-18	5.263e-16	4.16216e-14	1.48565e-12	3.10185e-11	4.33475e-10	4.40483e-09	3.4426e-08	2.15486e-07	1.11377e-06	4.86829e-06
		36	0			0	0	0	0	0	0	0	0	0	0	0	0	0	0	0	0	0	0	0	0	0	0	0	0	0	0	0	0	0	0	0	0	0	0	4.37894e-19	1.68136e-16	1.39708e-14	5.23648e-13	1.14721e-11	1.68087e-10	1.78934e-09	1.4638e-08	9.58277e-08	5.17604e-07
		37	0			0	0	0	0	0	0	0	0	0	0	0	0	0	0	0	0	0	0	0	0	0	0	0	0	0	0	0	0	0	0	0	0	0	0	0	1.3315e-19	5.36422e-17	4.67697e-15	1.83843e-13	4.22097e-12	6.47645e-11	7.21421e-10	6.17069e-09	4.22047e-08
		38	0			0	0	0	0	0	0	0	0	0	0	0	0	0	0	0	0	0	0	0	0	0	0	0	0	0	0	0	0	0	0	0	0	0	0	0	0	4.04868e-20	1.70923e-17	1.56175e-15	6.43027e-14	1.54542e-12	2.48034e-11	2.88792e-10	2.58005e-09
		39	0			0	0	0	0	0	0	0	0	0	0	0	0	0	0	0	0	0	0	0	0	0	0	0	0	0	0	0	0	0	0	0	0	0	0	0	0	0	1.23108e-20	5.43962e-18	5.20255e-16	2.24113e-14	5.63183e-13	9.44472e-12	1.14824e-10
		40	0			0	0	0	0	0	0	0	0	0	0	0	0	0	0	0	0	0	0	0	0	0	0	0	0	0	0	0	0	0	0	0	0	0	0	0	0	0	0	3.74333e-21	1.72918e-18	1.72914e-16	7.78461e-15	2.04326e-13	3.57676e-12
		41	0			0	0	0	0	0	0	0	0	0	0	0	0	0	0	0	0	0	0	0	0	0	0	0	0	0	0	0	0	0	0	0	0	0	0	0	0	0	0	0	1.13823e-21	5.49085e-19	5.73462e-17	2.69532e-15	7.38172e-14
		42	0			0	0	0	0	0	0	0	0	0	0	0	0	0	0	0	0	0	0	0	0	0	0	0	0	0	0	0	0	0	0	0	0	0	0	0	0	0	0	0	0	3.461e-22	1.74176e-19	1.89793e-17	9.30358e-16
		43	0			0	0	0	0	0	0	0	0	0	0	0	0	0	0	0	0	0	0	0	0	0	0	0	0	0	0	0	0	0	0	0	0	0	0	0	0	0	0	0	0	0	1.05238e-22	5.51958e-20	6.26905e-18
		44	0			0	0	0	0	0	0	0	0	0	0	0	0	0	0	0	0	0	0	0	0	0	0	0	0	0	0	0	0	0	0	0	0	0	0	0	0	0	0	0	0	0	0	3.19997e-23	1.74749e-20
		45	0			0	0	0	0	0	0	0	0	0	0	0	0	0	0	0	0	0	0	0	0	0	0	0	0	0	0	0	0	0	0	0	0	0	0	0	0	0	0	0	0	0	0	0	9.73013e-24
		46	0			0	0	0	0	0	0	0	0	0	0	0	0	0	0	0	0	0	0	0	0	0	0	0	0	0	0	0	0	0	0	0	0	0	0	0	0	0	0	0	0	0	0	0	0
		47	0			0	0	0	0	0	0	0	0	0	0	0	0	0	0	0	0	0	0	0	0	0	0	0	0	0	0	0	0	0	0	0	0	0	0	0	0	0	0	0	0	0	0	0	0
		48	0			0	0	0	0	0	0	0	0	0	0	0	0	0	0	0	0	0	0	0	0	0	0	0	0	0	0	0	0	0	0	0	0	0	0	0	0	0	0	0	0	0	0	0	0
		49	0			0	0	0	0	0	0	0	0	0	0	0	0	0	0	0	0	0	0	0	0	0	0	0	0	0	0	0	0	0	0	0	0	0	0	0	0	0	0	0	0	0	0	0	0
		50	0			0	0	0	0	0	0	0	0	0	0	0	0	0	0	0	0	0	0	0	0	0	0	0	0	0	0	0	0	0	0	0	0	0	0	0	0	0	0	0	0	0	0	0	0
		51	0			0	0	0	0	0	0	0	0	0	0	0	0	0	0	0	0	0	0	0	0	0	0	0	0	0	0	0	0	0	0	0	0	0	0	0	0	0	0	0	0	0	0	0	0
		52	0			0	0	0	0	0	0	0	0	0	0	0	0	0	0	0	0	0	0	0	0	0	0	0	0	0	0	0	0	0	0	0	0	0	0	0	0	0	0	0	0	0	0	0	0
		53	0			0	0	0	0	0	0	0	0	0	0	0	0	0	0	0	0	0	0	0	0	0	0	0	0	0	0	0	0	0	0	0	0	0	0	0	0	0	0	0	0	0	0	0	0
		54	0			0	0	0	0	0	0	0	0	0	0	0	0	0	0	0	0	0	0	0	0	0	0	0	0	0	0	0	0	0	0	0	0	0	0	0	0	0	0	0	0	0	0	0	0
		55	0			0	0	0	0	0	0	0	0	0	0	0	0	0	0	0	0	0	0	0	0	0	0	0	0	0	0	0	0	0	0	0	0	0	0	0	0	0	0	0	0	0	0	0	0
		56	0			0	0	0	0	0	0	0	0	0	0	0	0	0	0	0	0	0	0	0	0	0	0	0	0	0	0	0	0	0	0	0	0	0	0	0	0	0	0	0	0	0	0	0	0
		57	0			0	0	0	0	0	0	0	0	0	0	0	0	0	0	0	0	0	0	0	0	0	0	0	0	0	0	0	0	0	0	0	0	0	0	0	0	0	0	0	0	0	0	0	0
		58	0			0	0	0	0	0	0	0	0	0	0	0	0	0	0	0	0	0	0	0	0	0	0	0	0	0	0	0	0	0	0	0	0	0	0	0	0	0	0	0	0	0	0	0	0
		59	0			0	0	0	0	0	0	0	0	0	0	0	0	0	0	0	0	0	0	0	0	0	0	0	0	0	0	0	0	0	0	0	0	0	0	0	0	0	0	0	0	0	0	0	0
		60	0			0	0	0	0	0	0	0	0	0	0	0	0	0	0	0	0	0	0	0	0	0	0	0	0	0	0	0	0	0	0	0	0	0	0	0	0	0	0	0	0	0	0	0	0
		61	0			0	0	0	0	0	0	0	0	0	0	0	0	0	0	0	0	0	0	0	0	0	0	0	0	0	0	0	0	0	0	0	0	0	0	0	0	0	0	0	0	0	0	0	0
		62	0			0	0	0	0	0	0	0	0	0	0	0	0	0	0	0	0	0	0	0	0	0	0	0	0	0	0	0	0	0	0	0	0	0	0	0	0	0	0	0	0	0	0	0	0
		63	0			0	0	0	0	0	0	0	0	0	0	0	0	0	0	0	0	0	0	0	0	0	0	0	0	0	0	0	0	0	0	0	0	0	0	0	0	0	0	0	0	0	0	0	0
		64	0			0	0	0	0	0	0	0	0	0	0	0	0	0	0	0	0	0	0	0	0	0	0	0	0	0	0	0	0	0	0	0	0	0	0	0	0	0	0	0	0	0	0	0	0
		65	0			0	0	0	0	0	0	0	0	0	0	0	0	0	0	0	0	0	0	0	0	0	0	0	0	0	0	0	0	0	0	0	0	0	0	0	0	0	0	0	0	0	0	0	0
		66	0			0	0	0	0	0	0	0	0	0	0	0	0	0	0	0	0	0	0	0	0	0	0	0	0	0	0	0	0	0	0	0	0	0	0	0	0	0	0	0	0	0	0	0	0
		67	0			0	0	0	0	0	0	0	0	0	0	0	0	0	0	0	0	0	0	0	0	0	0	0	0	0	0	0	0	0	0	0	0	0	0	0	0	0	0	0	0	0	0	0	0
		68	0			0	0	0	0	0	0	0	0	0	0	0	0	0	0	0	0	0	0	0	0	0	0	0	0	0	0	0	0	0	0	0	0	0	0	0	0	0	0	0	0	0	0	0	0
		69	0			0	0	0	0	0	0	0	0	0	0	0	0	0	0	0	0	0	0	0	0	0	0	0	0	0	0	0	0	0	0	0	0	0	0	0	0	0	0	0	0	0	0	0	0
		70	0			0	0	0	0	0	0	0	0	0	0	0	0	0	0	0	0	0	0	0	0	0	0	0	0	0	0	0	0	0	0	0	0	0	0	0	0	0	0	0	0	0	0	0	0
		71	0			0	0	0	0	0	0	0	0	0	0	0	0	0	0	0	0	0	0	0	0	0	0	0	0	0	0	0	0	0	0	0	0	0	0	0	0	0	0	0	0	0	0	0	0
		72	0			0	0	0	0	0	0	0	0	0	0	0	0	0	0	0	0	0	0	0	0	0	0	0	0	0	0	0	0	0	0	0	0	0	0	0	0	0	0	0	0	0	0	0	0
		73	0			0	0	0	0	0	0	0	0	0	0	0	0	0	0	0	0	0	0	0	0	0	0	0	0	0	0	0	0	0	0	0	0	0	0	0	0	0	0	0	0	0	0	0	0
		74	0			0	0	0	0	0	0	0	0	0	0	0	0	0	0	0	0	0	0	0	0	0	0	0	0	0	0	0	0	0	0	0	0	0	0	0	0	0	0	0	0	0	0	0	0
		75	0			0	0	0	0	0	0	0	0	0	0	0	0	0	0	0	0	0	0	0	0	0	0	0	0	0	0	0	0	0	0	0	0	0	0	0	0	0	0	0	0	0	0	0	0
		76	0			0	0	0	0	0	0	0	0	0	0	0	0	0	0	0	0	0	0	0	0	0	0	0	0	0	0	0	0	0	0	0	0	0	0	0	0	0	0	0	0	0	0	0	0
		77	0			0	0	0	0	0	0	0	0	0	0	0	0	0	0	0	0	0	0	0	0	0	0	0	0	0	0	0	0	0	0	0	0	0	0	0	0	0	0	0	0	0	0	0	0
		78	0			0	0	0	0	0	0	0	0	0	0	0	0	0	0	0	0	0	0	0	0	0	0	0	0	0	0	0	0	0	0	0	0	0	0	0	0	0	0	0	0	0	0	0	0
		79	0			0	0	0	0	0	0	0	0	0	0	0	0	0	0	0	0	0	0	0	0	0	0	0	0	0	0	0	0	0	0	0	0	0	0	0	0	0	0	0	0	0	0	0	0
		80	0			0	0	0	0	0	0	0	0	0	0	0	0	0	0	0	0	0	0	0	0	0	0	0	0	0	0	0	0	0	0	0	0	0	0	0	0	0	0	0	0	0	0	0	0
		81	0			0	0	0	0	0	0	0	0	0	0	0	0	0	0	0	0	0	0	0	0	0	0	0	0	0	0	0	0	0	0	0	0	0	0	0	0	0	0	0	0	0	0	0	0
		82	0			0	0	0	0	0	0	0	0	0	0	0	0	0	0	0	0	0	0	0	0	0	0	0	0	0	0	0	0	0	0	0	0	0	0	0	0	0	0	0	0	0	0	0	0
		83	0			0	0	0	0	0	0	0	0	0	0	0	0	0	0	0	0	0	0	0	0	0	0	0	0	0	0	0	0	0	0	0	0	0	0	0	0	0	0	0	0	0	0	0	0
		84	0			0	0	0	0	0	0	0	0	0	0	0	0	0	0	0	0	0	0	0	0	0	0	0	0	0	0	0	0	0	0	0	0	0	0	0	0	0	0	0	0	0	0	0	0
		85	0			0	0	0	0	0	0	0	0	0	0	0	0	0	0	0	0	0	0	0	0	0	0	0	0	0	0	0	0	0	0	0	0	0	0	0	0	0	0	0	0	0	0	0	0
		86	0			0	0	0	0	0	0	0	0	0	0	0	0	0	0	0	0	0	0	0	0	0	0	0	0	0	0	0	0	0	0	0	0	0	0	0	0	0	0	0	0	0	0	0	0
		87	0			0	0	0	0	0	0	0	0	0	0	0	0	0	0	0	0	0	0	0	0	0	0	0	0	0	0	0	0	0	0	0	0	0	0	0	0	0	0	0	0	0	0	0	0
		88	0			0	0	0	0	0	0	0	0	0	0	0	0	0	0	0	0	0	0	0	0	0	0	0	0	0	0	0	0	0	0	0	0	0	0	0	0	0	0	0	0	0	0	0	0
		89	0			0	0	0	0	0	0	0	0	0	0	0	0	0	0	0	0	0	0	0	0	0	0	0	0	0	0	0	0	0	0	0	0	0	0	0	0	0	0	0	0	0	0	0	0
		90	0			0	0	0	0	0	0	0	0	0	0	0	0	0	0	0	0	0	0	0	0	0	0	0	0	0	0	0	0	0	0	0	0	0	0	0	0	0	0	0	0	0	0	0	0
		91	0			0	0	0	0	0	0	0	0	0	0	0	0	0	0	0	0	0	0	0	0	0	0	0	0	0	0	0	0	0	0	0	0	0	0	0	0	0	0	0	0	0	0	0	0
		92	0			0	0	0	0	0	0	0	0	0	0	0	0	0	0	0	0	0	0	0	0	0	0	0	0	0	0	0	0	0	0	0	0	0	0	0	0	0	0	0	0	0	0	0	0
		93	0			0	0	0	0	0	0	0	0	0	0	0	0	0	0	0	0	0	0	0	0	0	0	0	0	0	0	0	0	0	0	0	0	0	0	0	0	0	0	0	0	0	0	0	0
		94	0			0	0	0	0	0	0	0	0	0	0	0	0	0	0	0	0	0	0	0	0	0	0	0	0	0	0	0	0	0	0	0	0	0	0	0	0	0	0	0	0	0	0	0	0
		95	0			0	0	0	0	0	0	0	0	0	0	0	0	0	0	0	0	0	0	0	0	0	0	0	0	0	0	0	0	0	0	0	0	0	0	0	0	0	0	0	0	0	0	0	0
		96	0			0	0	0	0	0	0	0	0	0	0	0	0	0	0	0	0	0	0	0	0	0	0	0	0	0	0	0	0	0	0	0	0	0	0	0	0	0	0	0	0	0	0	0	0
		97	0			0	0	0	0	0	0	0	0	0	0	0	0	0	0	0	0	0	0	0	0	0	0	0	0	0	0	0	0	0	0	0	0	0	0	0	0	0	0	0	0	0	0	0	0
		98	0			0	0	0	0	0	0	0	0	0	0	0	0	0	0	0	0	0	0	0	0	0	0	0	0	0	0	0	0	0	0	0	0	0	0	0	0	0	0	0	0	0	0	0	0
		99	0			0	0	0	0	0	0	0	0	0	0	0	0	0	0	0	0	0	0	0	0	0	0	0	0	0	0	0	0	0	0	0	0	0	0	0	0	0	0	0	0	0	0	0	0
		100	0			0	0	0	0	0	0	0	0	0	0	0	0	0	0	0	0	0	0	0	0	0	0	0	0	0	0	0	0	0	0	0	0	0	0	0	0	0	0	0	0	0	0	0	0
		101	0			0	0	0	0	0	0	0	0	0	0	0	0	0	0	0	0	0	0	0	0	0	0	0	0	0	0	0	0	0	0	0	0	0	0	0	0	0	0	0	0	0	0	0	0
		102	0			0	0	0	0	0	0	0	0	0	0	0	0	0	0	0	0	0	0	0	0	0	0	0	0	0	0	0	0	0	0	0	0	0	0	0	0	0	0	0	0	0	0	0	0
		103	0			0	0	0	0	0	0	0	0	0	0	0	0	0	0	0	0	0	0	0	0	0	0	0	0	0	0	0	0	0	0	0	0	0	0	0	0	0	0	0	0	0	0	0	0
		104	0			0	0	0	0	0	0	0	0	0	0	0	0	0	0	0	0	0	0	0	0	0	0	0	0	0	0	0	0	0	0	0	0	0	0	0	0	0	0	0	0	0	0	0	0
		105	0			0	0	0	0	0	0	0	0	0	0	0	0	0	0	0	0	0	0	0	0	0	0	0	0	0	0	0	0	0	0	0	0	0	0	0	0	0	0	0	0	0	0	0	0
		106	0			0	0	0	0	0	0	0	0	0	0	0	0	0	0	0	0	0	0	0	0	0	0	0	0	0	0	0	0	0	0	0	0	0	0	0	0	0	0	0	0	0	0	0	0
		107	0			0	0	0	0	0	0	0	0	0	0	0	0	0	0	0	0	0	0	0	0	0	0	0	0	0	0	0	0	0	0	0	0	0	0	0	0	0	0	0	0	0	0	0	0
		108	0			0	0	0	0	0	0	0	0	0	0	0	0	0	0	0	0	0	0	0	0	0	0	0	0	0	0	0	0	0	0	0	0	0	0	0	0	0	0	0	0	0	0	0	0
		109	0			0	0	0	0	0	0	0	0	0	0	0	0	0	0	0	0	0	0	0	0	0	0	0	0	0	0	0	0	0	0	0	0	0	0	0	0	0	0	0	0	0	0	0	0
		110	0			0	0	0	0	0	0	0	0	0	0	0	0	0	0	0	0	0	0	0	0	0	0	0	0	0	0	0	0	0	0	0	0	0	0	0	0	0	0	0	0	0	0	0	0
		111	0			0	0	0	0	0	0	0	0	0	0	0	0	0	0	0	0	0	0	0	0	0	0	0	0	0	0	0	0	0	0	0	0	0	0	0	0	0	0	0	0	0	0	0	0
		112	0			0	0	0	0	0	0	0	0	0	0	0	0	0	0	0	0	0	0	0	0	0	0	0	0	0	0	0	0	0	0	0	0	0	0	0	0	0	0	0	0	0	0	0	0
		113	0			0	0	0	0	0	0	0	0	0	0	0	0	0	0	0	0	0	0	0	0	0	0	0	0	0	0	0	0	0	0	0	0	0	0	0	0	0	0	0	0	0	0	0	0
		114	0			0	0	0	0	0	0	0	0	0	0	0	0	0	0	0	0	0	0	0	0	0	0	0	0	0	0	0	0	0	0	0	0	0	0	0	0	0	0	0	0	0	0	0	0
		115	0			0	0	0	0	0	0	0	0	0	0	0	0	0	0	0	0	0	0	0	0	0	0	0	0	0	0	0	0	0	0	0	0	0	0	0	0	0	0	0	0	0	0	0	0
		116	0			0	0	0	0	0	0	0	0	0	0	0	0	0	0	0	0	0	0	0	0	0	0	0	0	0	0	0	0	0	0	0	0	0	0	0	0	0	0	0	0	0	0	0	0
		117	0			0	0	0	0	0	0	0	0	0	0	0	0	0	0	0	0	0	0	0	0	0	0	0	0	0	0	0	0	0	0	0	0	0	0	0	0	0	0	0	0	0	0	0	0
		118	0			0	0	0	0	0	0	0	0	0	0	0	0	0	0	0	0	0	0	0	0	0	0	0	0	0	0	0	0	0	0	0	0	0	0	0	0	0	0	0	0	0	0	0	0
		119	0			0	0	0	0	0	0	0	0	0	0	0	0	0	0	0	0	0	0	0	0	0	0	0	0	0	0	0	0	0	0	0	0	0	0	0	0	0	0	0	0	0	0	0	0
		120	0			0	0	0	0	0	0	0	0	0	0	0	0	0	0	0	0	0	0	0	0	0	0	0	0	0	0	0	0	0	0	0	0	0	0	0	0	0	0	0	0	0	0	0	0
		121	0			0	0	0	0	0	0	0	0	0	0	0	0	0	0	0	0	0	0	0	0	0	0	0	0	0	0	0	0	0	0	0	0	0	0	0	0	0	0	0	0	0	0	0	0
		122	0			0	0	0	0	0	0	0	0	0	0	0	0	0	0	0	0	0	0	0	0	0	0	0	0	0	0	0	0	0	0	0	0	0	0	0	0	0	0	0	0	0	0	0	0
		123	0			0	0	0	0	0	0	0	0	0	0	0	0	0	0	0	0	0	0	0	0	0	0	0	0	0	0	0	0	0	0	0	0	0	0	0	0	0	0	0	0	0	0	0	0
		124	0			0	0	0	0	0	0	0	0	0	0	0	0	0	0	0	0	0	0	0	0	0	0	0	0	0	0	0	0	0	0	0	0	0	0	0	0	0	0	0	0	0	0	0	0
		125	0			0	0	0	0	0	0	0	0	0	0	0	0	0	0	0	0	0	0	0	0	0	0	0	0	0	0	0	0	0	0	0	0	0	0	0	0	0	0	0	0	0	0	0	0
		126	0			0	0	0	0	0	0	0	0	0	0	0	0	0	0	0	0	0	0	0	0	0	0	0	0	0	0	0	0	0	0	0	0	0	0	0	0	0	0	0	0	0	0	0	0
		127	0			0	0	0	0	0	0	0	0	0	0	0	0	0	0	0	0	0	0	0	0	0	0	0	0	0	0	0	0	0	0	0	0	0	0	0	0	0	0	0	0	0	0	0	0
		128	0			0	0	0	0	0	0	0	0	0	0	0	0	0	0	0	0	0	0	0	0	0	0	0	0	0	0	0	0	0	0	0	0	0	0	0	0	0	0	0	0	0	0	0	0
		129	0			0	0	0	0	0	0	0	0	0	0	0	0	0	0	0	0	0	0	0	0	0	0	0	0	0	0	0	0	0	0	0	0	0	0	0	0	0	0	0	0	0	0	0	0
		130	0			0	0	0	0	0	0	0	0	0	0	0	0	0	0	0	0	0	0	0	0	0	0	0	0	0	0	0	0	0	0	0	0	0	0	0	0	0	0	0	0	0	0	0	0
		131	0			0	0	0	0	0	0	0	0	0	0	0	0	0	0	0	0	0	0	0	0	0	0	0	0	0	0	0	0	0	0	0	0	0	0	0	0	0	0	0	0	0	0	0	0
		132	0			0	0	0	0	0	0	0	0	0	0	0	0	0	0	0	0	0	0	0	0	0	0	0	0	0	0	0	0	0	0	0	0	0	0	0	0	0	0	0	0	0	0	0	0
		133	0			0	0	0	0	0	0	0	0	0	0	0	0	0	0	0	0	0	0	0	0	0	0	0	0	0	0	0	0	0	0	0	0	0	0	0	0	0	0	0	0	0	0	0	0
		134	0			0	0	0	0	0	0	0	0	0	0	0	0	0	0	0	0	0	0	0	0	0	0	0	0	0	0	0	0	0	0	0	0	0	0	0	0	0	0	0	0	0	0	0	0
		135	0			0	0	0	0	0	0	0	0	0	0	0	0	0	0	0	0	0	0	0	0	0	0	0	0	0	0	0	0	0	0	0	0	0	0	0	0	0	0	0	0	0	0	0	0
		136	0			0	0	0	0	0	0	0	0	0	0	0	0	0	0	0	0	0	0	0	0	0	0	0	0	0	0	0	0	0	0	0	0	0	0	0	0	0	0	0	0	0	0	0	0
		137	0			0	0	0	0	0	0	0	0	0	0	0	0	0	0	0	0	0	0	0	0	0	0	0	0	0	0	0	0	0	0	0	0	0	0	0	0	0	0	0	0	0	0	0	0
		138	0			0	0	0	0	0	0	0	0	0	0	0	0	0	0	0	0	0	0	0	0	0	0	0	0	0	0	0	0	0	0	0	0	0	0	0	0	0	0	0	0	0	0	0	0
		139	0			0	0	0	0	0	0	0	0	0	0	0	0	0	0	0	0	0	0	0	0	0	0	0	0	0	0	0	0	0	0	0	0	0	0	0	0	0	0	0	0	0	0	0	0
		140	0			0	0	0	0	0	0	0	0	0	0	0	0	0	0	0	0	0	0	0	0	0	0	0	0	0	0	0	0	0	0	0	0	0	0	0	0	0	0	0	0	0	0	0	0
		141	0			0	0	0	0	0	0	0	0	0	0	0	0	0	0	0	0	0	0	0	0	0	0	0	0	0	0	0	0	0	0	0	0	0	0	0	0	0	0	0	0	0	0	0	0
		142	0			0	0	0	0	0	0	0	0	0	0	0	0	0	0	0	0	0	0	0	0	0	0	0	0	0	0	0	0	0	0	0	0	0	0	0	0	0	0	0	0	0	0	0	0
		143	0			0	0	0	0	0	0	0	0	0	0	0	0	0	0	0	0	0	0	0	0	0	0	0	0	0	0	0	0	0	0	0	0	0	0	0	0	0	0	0	0	0	0	0	0
		144	0			0	0	0	0	0	0	0	0	0	0	0	0	0	0	0	0	0	0	0	0	0	0	0	0	0	0	0	0	0	0	0	0	0	0	0	0	0	0	0	0	0	0	0	0
		145	0			0	0	0	0	0	0	0	0	0	0	0	0	0	0	0	0	0	0	0	0	0	0	0	0	0	0	0	0	0	0	0	0	0	0	0	0	0	0	0	0	0	0	0	0
		146	0			0	0	0	0	0	0	0	0	0	0	0	0	0	0	0	0	0	0	0	0	0	0	0	0	0	0	0	0	0	0	0	0	0	0	0	0	0	0	0	0	0	0	0	0
		147	0			0	0	0	0	0	0	0	0	0	0	0	0	0	0	0	0	0	0	0	0	0	0	0	0	0	0	0	0	0	0	0	0	0	0	0	0	0	0	0	0	0	0	0	0
		148	0			0	0	0	0	0	0	0	0	0	0	0	0	0	0	0	0	0	0	0	0	0	0	0	0	0	0	0	0	0	0	0	0	0	0	0	0	0	0	0	0	0	0	0	0
		149	0			0	0	0	0	0	0	0	0	0	0	0	0	0	0	0	0	0	0	0	0	0	0	0	0	0	0	0	0	0	0	0	0	0	0	0	0	0	0	0	0	0	0	0	0
		150	0			0	0	0	0	0	0	0	0	0	0	0	0	0	0	0	0	0	0	0	0	0	0	0	0	0	0	0	0	0	0	0	0	0	0	0	0	0	0	0	0	0	0	0	0
		151	0			0	0	0	0	0	0	0	0	0	0	0	0	0	0	0	0	0	0	0	0	0	0	0	0	0	0	0	0	0	0	0	0	0	0	0	0	0	0	0	0	0	0	0	0
		152	0			0	0	0	0	0	0	0	0	0	0	0	0	0	0	0	0	0	0	0	0	0	0	0	0	0	0	0	0	0	0	0	0	0	0	0	0	0	0	0	0	0	0	0	0
		153	0			0	0	0	0	0	0	0	0	0	0	0	0	0	0	0	0	0	0	0	0	0	0	0	0	0	0	0	0	0	0	0	0	0	0	0	0	0	0	0	0	0	0	0	0
		154	0			0	0	0	0	0	0	0	0	0	0	0	0	0	0	0	0	0	0	0	0	0	0	0	0	0	0	0	0	0	0	0	0	0	0	0	0	0	0	0	0	0	0	0	0
		155	0			0	0	0	0	0	0	0	0	0	0	0	0	0	0	0	0	0	0	0	0	0	0	0	0	0	0	0	0	0	0	0	0	0	0	0	0	0	0	0	0	0	0	0	0
		156	0			0	0	0	0	0	0	0	0	0	0	0	0	0	0	0	0	0	0	0	0	0	0	0	0	0	0	0	0	0	0	0	0	0	0	0	0	0	0	0	0	0	0	0	0
		157	0			0	0	0	0	0	0	0	0	0	0	0	0	0	0	0	0	0	0	0	0	0	0	0	0	0	0	0	0	0	0	0	0	0	0	0	0	0	0	0	0	0	0	0	0
		158	0			0	0	0	0	0	0	0	0	0	0	0	0	0	0	0	0	0	0	0	0	0	0	0	0	0	0	0	0	0	0	0	0	0	0	0	0	0	0	0	0	0	0	0	0
		159	0			0	0	0	0	0	0	0	0	0	0	0	0	0	0	0	0	0	0	0	0	0	0	0	0	0	0	0	0	0	0	0	0	0	0	0	0	0	0	0	0	0	0	0	0
		160	0			0	0	0	0	0	0	0	0	0	0	0	0	0	0	0	0	0	0	0	0	0	0	0	0	0	0	0	0	0	0	0	0	0	0	0	0	0	0	0	0	0	0	0	0
		161	0			0	0	0	0	0	0	0	0	0	0	0	0	0	0	0	0	0	0	0	0	0	0	0	0	0	0	0	0	0	0	0	0	0	0	0	0	0	0	0	0	0	0	0	0
		162	0			0	0	0	0	0	0	0	0	0	0	0	0	0	0	0	0	0	0	0	0	0	0	0	0	0	0	0	0	0	0	0	0	0	0	0	0	0	0	0	0	0	0	0	0
		163	0			0	0	0	0	0	0	0	0	0	0	0	0	0	0	0	0	0	0	0	0	0	0	0	0	0	0	0	0	0	0	0	0	0	0	0	0	0	0	0	0	0	0	0	0
		164	0			0	0	0	0	0	0	0	0	0	0	0	0	0	0	0	0	0	0	0	0	0	0	0	0	0	0	0	0	0	0	0	0	0	0	0	0	0	0	0	0	0	0	0	0
		165	0			0	0	0	0	0	0	0	0	0	0	0	0	0	0	0	0	0	0	0	0	0	0	0	0	0	0	0	0	0	0	0	0	0	0	0	0	0	0	0	0	0	0	0	0
		166	0			0	0	0	0	0	0	0	0	0	0	0	0	0	0	0	0	0	0	0	0	0	0	0	0	0	0	0	0	0	0	0	0	0	0	0	0	0	0	0	0	0	0	0	0
		167	0			0	0	0	0	0	0	0	0	0	0	0	0	0	0	0	0	0	0	0	0	0	0	0	0	0	0	0	0	0	0	0	0	0	0	0	0	0	0	0	0	0	0	0	0
		168	0			0	0	0	0	0	0	0	0	0	0	0	0	0	0	0	0	0	0	0	0	0	0	0	0	0	0	0	0	0	0	0	0	0	0	0	0	0	0	0	0	0	0	0	0
		169	0			0	0	0	0	0	0	0	0	0	0	0	0	0	0	0	0	0	0	0	0	0	0	0	0	0	0	0	0	0	0	0	0	0	0	0	0	0	0	0	0	0	0	0	0
		170	0			0	0	0	0	0	0	0	0	0	0	0	0	0	0	0	0	0	0	0	0	0	0	0	0	0	0	0	0	0	0	0	0	0	0	0	0	0	0	0	0	0	0	0	0
		171	0			0	0	0	0	0	0	0	0	0	0	0	0	0	0	0	0	0	0	0	0	0	0	0	0	0	0	0	0	0	0	0	0	0	0	0	0	0	0	0	0	0	0	0	0
		172	0			0	0	0	0	0	0	0	0	0	0	0	0	0	0	0	0	0	0	0	0	0	0	0	0	0	0	0	0	0	0	0	0	0	0	0	0	0	0	0	0	0	0	0	0
		173	0			0	0	0	0	0	0	0	0	0	0	0	0	0	0	0	0	0	0	0	0	0	0	0	0	0	0	0	0	0	0	0	0	0	0	0	0	0	0	0	0	0	0	0	0
		174	0			0	0	0	0	0	0	0	0	0	0	0	0	0	0	0	0	0	0	0	0	0	0	0	0	0	0	0	0	0	0	0	0	0	0	0	0	0	0	0	0	0	0	0	0
		175	0			0	0	0	0	0	0	0	0	0	0	0	0	0	0	0	0	0	0	0	0	0	0	0	0	0	0	0	0	0	0	0	0	0	0	0	0	0	0	0	0	0	0	0	0
		176	0			0	0	0	0	0	0	0	0	0	0	0	0	0	0	0	0	0	0	0	0	0	0	0	0	0	0	0	0	0	0	0	0	0	0	0	0	0	0	0	0	0	0	0	0
		177	0			0	0	0	0	0	0	0	0	0	0	0	0	0	0	0	0	0	0	0	0	0	0	0	0	0	0	0	0	0	0	0	0	0	0	0	0	0	0	0	0	0	0	0	0
		178	0			0	0	0	0	0	0	0	0	0	0	0	0	0	0	0	0	0	0	0	0	0	0	0	0	0	0	0	0	0	0	0	0	0	0	0	0	0	0	0	0	0	0	0	0
		179	0			0	0	0	0	0	0	0	0	0	0	0	0	0	0	0	0	0	0	0	0	0	0	0	0	0	0	0	0	0	0	0	0	0	0	0	0	0	0	0	0	0	0	0	0
		180	0			0	0	0	0	0	0	0	0	0	0	0	0	0	0	0	0	0	0	0	0	0	0	0	0	0	0	0	0	0	0	0	0	0	0	0	0	0	0	0	0	0	0	0	0
		181	0			0	0	0	0	0	0	0	0	0	0	0	0	0	0	0	0	0	0	0	0	0	0	0	0	0	0	0	0	0	0	0	0	0	0	0	0	0	0	0	0	0	0	0	0
		182	0			0	0	0	0	0	0	0	0	0	0	0	0	0	0	0	0	0	0	0	0	0	0	0	0	0	0	0	0	0	0	0	0	0	0	0	0	0	0	0	0	0	0	0	0
		183	0			0	0	0	0	0	0	0	0	0	0	0	0	0	0	0	0	0	0	0	0	0	0	0	0	0	0	0	0	0	0	0	0	0	0	0	0	0	0	0	0	0	0	0	0
		184	0			0	0	0	0	0	0	0	0	0	0	0	0	0	0	0	0	0	0	0	0	0	0	0	0	0	0	0	0	0	0	0	0	0	0	0	0	0	0	0	0	0	0	0	0
		185	0			0	0	0	0	0	0	0	0	0	0	0	0	0	0	0	0	0	0	0	0	0	0	0	0	0	0	0	0	0	0	0	0	0	0	0	0	0	0	0	0	0	0	0	0
		186	0			0	0	0	0	0	0	0	0	0	0	0	0	0	0	0	0	0	0	0	0	0	0	0	0	0	0	0	0	0	0	0	0	0	0	0	0	0	0	0	0	0	0	0	0
		187	0			0	0	0	0	0	0	0	0	0	0	0	0	0	0	0	0	0	0	0	0	0	0	0	0	0	0	0	0	0	0	0	0	0	0	0	0	0	0	0	0	0	0	0	0
		188	0			0	0	0	0	0	0	0	0	0	0	0	0	0	0	0	0	0	0	0	0	0	0	0	0	0	0	0	0	0	0	0	0	0	0	0	0	0	0	0	0	0	0	0	0
		189	0			0	0	0	0	0	0	0	0	0	0	0	0	0	0	0	0	0	0	0	0	0	0	0	0	0	0	0	0	0	0	0	0	0	0	0	0	0	0	0	0	0	0	0	0
		190	0			0	0	0	0	0	0	0	0	0	0	0	0	0	0	0	0	0	0	0	0	0	0	0	0	0	0	0	0	0	0	0	0	0	0	0	0	0	0	0	0	0	0	0	0
		191	0			0	0	0	0	0	0	0	0	0	0	0	0	0	0	0	0	0	0	0	0	0	0	0	0	0	0	0	0	0	0	0	0	0	0	0	0	0	0	0	0	0	0	0	0
		192	0			0	0	0	0	0	0	0	0	0	0	0	0	0	0	0	0	0	0	0	0	0	0	0	0	0	0	0	0	0	0	0	0	0	0	0	0	0	0	0	0	0	0	0	0
		193	0			0	0	0	0	0	0	0	0	0	0	0	0	0	0	0	0	0	0	0	0	0	0	0	0	0	0	0	0	0	0	0	0	0	0	0	0	0	0	0	0	0	0	0	0
		194	0			0	0	0	0	0	0	0	0	0	0	0	0	0	0	0	0	0	0	0	0	0	0	0	0	0	0	0	0	0	0	0	0	0	0	0	0	0	0	0	0	0	0	0	0
		195	0			0	0	0	0	0	0	0	0	0	0	0	0	0	0	0	0	0	0	0	0	0	0	0	0	0	0	0	0	0	0	0	0	0	0	0	0	0	0	0	0	0	0	0	0
		196	0			0	0	0	0	0	0	0	0	0	0	0	0	0	0	0	0	0	0	0	0	0	0	0	0	0	0	0	0	0	0	0	0	0	0	0	0	0	0	0	0	0	0	0	0
		197	0			0	0	0	0	0	0	0	0	0	0	0	0	0	0	0	0	0	0	0	0	0	0	0	0	0	0	0	0	0	0	0	0	0	0	0	0	0	0	0	0	0	0	0	0
		198	0			0	0	0	0	0	0	0	0	0	0	0	0	0	0	0	0	0	0	0	0	0	0	0	0	0	0	0	0	0	0	0	0	0	0	0	0	0	0	0	0	0	0	0	0
		199	0			0	0	0	0	0	0	0	0	0	0	0	0	0	0	0	0	0	0	0	0	0	0	0	0	0	0	0	0	0	0	0	0	0	0	0	0	0	0	0	0	0	0	0	0
		200	0			0	0	0	0	0	0	0	0	0	0	0	0	0	0	0	0	0	0	0	0	0	0	0	0	0	0	0	0	0	0	0	0	0	0	0	0	0	0	0	0	0	0	0	0
[truncated: 155 more columns]

## Sheet: CPD
λ=	2.00457		F=	4.65607																										6.89192e-22
ϑ=	0.276997		p-value=	0.0158155
Sample λ=	1.85556
# of r's:	10	SS=	30.8923		143.837			k=		0	1	2	3	4	5	6	7	8	9	10	11	12	13	14	15	16	17	18	19	20	21	22	23	24	25	26	27	28	29	30	31	32	33	34	35	36	37	38	39
r	Frequency	CPD		Poisson			Probability	r	0	0	0	0	0	0	0	0	0	0	0	0	0	0	0	0	0	0	0	0	0	0	0	0	0	0	0	0	0	0	0	0	0	0	0	0	0	0	0	0	0
0	22	21.1259	0.764003	14.0729	62.8382		0.234733	0	0	1	0	0	0	0	0	0	0	0	0	0	0	0	0	0	0	0	0	0	0	0	0	0	0	0	0	0	0	0	0	0	0	0	0	0	0	0	0	0	0
1	23	23.9766	0.953658	26.1131	9.69158		0.266406	1	0	0	1.13494	0	0	0	0	0	0	0	0	0	0	0	0	0	0	0	0	0	0	0	0	0	0	0	0	0	0	0	0	0	0	0	0	0	0	0	0	0	0
2	19	17.8797	1.25507	24.2272	27.3234		0.198663	2	0	0	0.2023	0.644039	0	0	0	0	0	0	0	0	0	0	0	0	0	0	0	0	0	0	0	0	0	0	0	0	0	0	0	0	0	0	0	0	0	0	0	0	0
3	10	11.2908	1.66627	14.985	24.8498		0.125454	3	0	0	0.061209	0.229598	0.243647	0	0	0	0	0	0	0	0	0	0	0	0	0	0	0	0	0	0	0	0	0	0	0	0	0	0	0	0	0	0	0	0	0	0	0	0
4	11	6.62257	19.1619	6.95136	16.3915		0.0735841	4	0	0	0.0241292	0.089931	0.130289	0.069131	0	0	0	0	0	0	0	0	0	0	0	0	0	0	0	0	0	0	0	0	0	0	0	0	0	0	0	0	0	0	0	0	0	0	0
5	3	3.77318	0.597802	2.57973	0.17663		0.0419242	5	0	0	0.0112097	0.0397677	0.0626449	0.04929	0.0156918	0	0	0	0	0	0	0	0	0	0	0	0	0	0	0	0	0	0	0	0	0	0	0	0	0	0	0	0	0	0	0	0	0	0
6	0	2.14065	4.5824	0.797804	0.636491		0.023785	6	0	0	0.00583221	0.0194769	0.0309735	0.0280922	0.0139852	0.0029682	0	0	0	0	0	0	0	0	0	0	0	0	0	0	0	0	0	0	0	0	0	0	0	0	0	0	0	0	0	0	0	0	0
7	0	1.22726	1.50618	0.211481	0.0447244		0.0136363	7	0	0	0.00329809	0.0103638	0.016138	0.01542	0.00921713	0.00317446	0.000481245	0	0	0	0	0	0	0	0	0	0	0	0	0	0	0	0	0	0	0	0	0	0	0	0	0	0	0	0	0	0	0	0
8	1	0.717392	0.0798675	0.0490519	0.904302		0.00797102	8	0	0	0.00198849	0.00590022	0.00887882	0.00857275	0.00557376	0.00237509	0.000600468	6.82728e-05	0	0	0	0	0	0	0	0	0	0	0	0	0	0	0	0	0	0	0	0	0	0	0	0	0	0	0	0	0	0	0
9	1	0.429816	0.32511	0.0101132	0.979876		0.00477574	9	0	0	0.00126152	0.00355148	0.00513866	0.00490764	0.00330655	0.00157086	0.000502778	9.73561e-05	8.60946e-06	0	0	0	0	0	0	0	0	0	0	0	0	0	0	0	0	0	0	0	0	0	0	0	0	0	0	0	0	0	0
10							0.00294091	10	0	0	0.000834205	0.00223944	0.00311227	0.00290727	0.0019763	0.000992969	0.000361318	9.01941e-05	1.38116e-05	9.77118e-07	0	0	0	0	0	0	0	0	0	0	0	0	0	0	0	0	0	0	0	0	0	0	0	0	0	0	0	0	0
11							0.00186334	11	0	0	0.000570976	0.00146865	0.0019624	0.00178285	0.00120391	0.000620624	0.000242855	7.00189e-05	1.40265e-05	1.7417e-06	1.00815e-07	0	0	0	0	0	0	0	0	0	0	0	0	0	0	0	0	0	0	0	0	0	0	0	0	0	0	0	0
12							0.00121452	12	0	0	0.00040235	0.000995956	0.00128209	0.00113004	0.000751105	0.000389948	0.0001588	4.99222e-05	1.17022e-05	1.92402e-06	1.97671e-07	9.53487e-09	0	0	0	0	0	0	0	0	0	0	0	0	0	0	0	0	0	0	0	0	0	0	0	0	0	0	0
13							0.00081356	13	0	0	0.000290678	0.000695176	0.000864277	0.000738639	0.000480694	0.000248387	0.000103104	3.41429e-05	8.82872e-06	1.71719e-06	2.35981e-07	2.03949e-08	8.3242e-10	0	0	0	0	0	0	0	0	0	0	0	0	0	0	0	0	0	0	0	0	0	0	0	0	0	0
14							0.00055924	14	0	0	0.000214581	0.000497551	0.000598979	0.000496628	0.000315554	0.000161076	6.72243e-05	2.29313e-05	6.31121e-06	1.36757e-06	2.24392e-07	2.61653e-08	1.92891e-09	6.74816e-11	0	0	0	0	0	0	0	0	0	0	0	0	0	0	0	0	0	0	0	0	0	0	0	0	0
15							0.00039378	15	0	0	0.000161425	0.000364012	0.000425428	0.000342615	0.000212286	0.000106547	4.4298e-05	1.53316e-05	4.38687e-06	1.02086e-06	1.88204e-07	2.64118e-08	2.64657e-09	1.68399e-10	5.10582e-12	0	0	0	0	0	0	0	0	0	0	0	0	0	0	0	0	0	0	0	0	0	0	0	0
16							0.000283483	16	0	0	0.000123475	0.00027152	0.000308829	0.000241952	0.000146162	7.19298e-05	2.96079e-05	1.02883e-05	3.01129e-06	7.34452e-07	1.46548e-07	2.32781e-08	2.82672e-09	2.46061e-10	1.36516e-11	3.62173e-13	0	0	0	0	0	0	0	0	0	0	0	0	0	0	0	0	0	0	0	0	0	0	0
17							0.000208252	17	0	0	9.58561e-05	0.000206041	0.000228595	0.000174522	0.000102838	4.95495e-05	2.01102e-05	6.96425e-06	2.0612e-06	5.18007e-07	1.09106e-07	1.88857e-08	2.61252e-09	2.77264e-10	2.11641e-11	1.03291e-12	2.4179e-14	0	0	0	0	0	0	0	0	0	0	0	0	0	0	0	0	0	0	0	0	0	0
18							0.000155828	18	0	0	7.54068e-05	0.000158771	0.000172185	0.000128325	7.38232e-05	3.48054e-05	1.38921e-05	4.76979e-06	1.41567e-06	3.62111e-07	7.91024e-08	1.4545e-08	2.20581e-09	2.68197e-10	2.50927e-11	1.69338e-12	7.32678e-14	1.52453e-15	0	0	0	0	0	0	0	0	0	0	0	0	0	0	0	0	0	0	0	0	0
19							0.000118564	19	0	0	6.00316e-05	0.000124042	0.000131746	9.60139e-05	5.39866e-05	2.49074e-05	9.76186e-06	3.31117e-06	9.79554e-07	2.52717e-07	5.65218e-08	1.0842e-08	1.75646e-09	2.3538e-10	2.53572e-11	2.10743e-12	1.26647e-13	4.89142e-15	9.10656e-17	0	0	0	0	0	0	0	0	0	0	0	0	0	0	0	0	0	0	0	0
20							9.15869e-05	20	0	0	4.83097e-05	9.81214e-05	0.000102243	7.29834e-05	4.01598e-05	1.81395e-05	6.97568e-06	2.33195e-06	6.84614e-07	1.76945e-07	4.01293e-08	7.92353e-09	1.34615e-09	1.93678e-10	2.31058e-11	2.22107e-12	1.65078e-13	8.89102e-15	3.08414e-16	5.16767e-18	0	0	0	0	0	0	0	0	0	0	0	0	0	0	0	0	0	0	0
21							7.17254e-05	21	0	0	3.926e-05	7.84965e-05	8.03713e-05	5.62808e-05	3.03467e-05	1.34295e-05	5.06632e-06	1.66671e-06	4.8407e-07	1.24707e-07	2.8469e-08	5.72801e-09	1.00661e-09	1.52594e-10	1.96332e-11	2.09892e-12	1.81161e-13	1.21134e-14	5.88083e-16	1.84226e-17	2.79285e-19	0	0	0	0	0	0	0	0	0	0	0	0	0	0	0	0	0	0
22							5.68748e-05	22	0	0	3.21927e-05	6.34437e-05	6.39196e-05	4.39734e-05	2.32644e-05	1.0096e-05	3.73715e-06	1.20887e-06	3.46588e-07	8.86656e-08	2.0261e-08	4.12181e-09	7.4144e-10	1.16777e-10	1.58985e-11	1.8405e-12	1.77353e-13	1.38218e-14	8.35938e-16	3.67701e-17	1.04542e-18	1.44077e-20	0	0	0	0	0	0	0	0	0	0	0	0	0	0	0	0	0
23							4.56127e-05	23	0	0	2.66154e-05	5.176e-05	5.13792e-05	3.47713e-05	1.80726e-05	7.69883e-06	2.79757e-06	8.89509e-07	2.51391e-07	6.36882e-08	1.45055e-08	2.96569e-09	5.4164e-10	8.76842e-11	1.24529e-11	1.53135e-12	1.6038e-13	1.40031e-14	9.90354e-16	5.4439e-17	2.17976e-18	5.64994e-20	7.10949e-22	0	0	0	0	0	0	0	0	0	0	0	0	0	0	0	0
24							3.69601e-05	24	0	0	2.21714e-05	4.25921e-05	4.17032e-05	2.77979e-05	1.42114e-05	5.94892e-06	2.12348e-06	6.63681e-07	1.84738e-07	4.62578e-08	1.04668e-08	2.14057e-09	3.94391e-10	6.50735e-11	9.53523e-12	1.22767e-12	1.37059e-13	1.30499e-14	1.03729e-15	6.68778e-17	3.35598e-18	1.22839e-19	2.91469e-21	3.362e-23	0	0	0	0	0	0	0	0	0	0	0	0	0	0	0
25							3.02326e-05	25	0	0	1.85987e-05	3.5326e-05	3.41533e-05	2.24477e-05	1.13011e-05	4.65339e-06	1.63294e-06	5.01824e-07	1.37521e-07	3.3989e-08	7.62203e-09	1.5535e-09	2.87289e-10	4.79905e-11	7.19278e-12	9.58824e-13	1.12453e-13	1.14502e-14	9.95534e-16	7.23475e-17	4.26991e-18	1.96387e-19	6.59681e-21	1.43825e-22	1.52626e-24	0	0	0	0	0	0	0	0	0	0	0	0	0	0
26							2.49443e-05	26	0	0	1.5703e-05	2.9514e-05	2.82013e-05	1.82957e-05	9.07992e-06	3.68152e-06	1.27111e-06	3.84276e-07	1.03668e-07	2.52693e-08	5.60614e-09	1.13554e-09	2.09929e-10	3.53129e-11	5.37622e-12	7.35471e-13	8.95946e-14	9.61321e-15	8.96457e-16	7.14596e-17	4.76643e-18	2.58489e-19	1.09367e-20	3.38338e-22	6.80135e-24	6.66234e-26	0	0	0	0	0	0	0	0	0	0	0	0	0
27							2.0745e-05	27	0	0	1.3338e-05	2.48252e-05	2.34641e-05	1.50394e-05	7.36514e-06	2.94338e-06	1.00077e-06	2.97808e-07	7.91036e-08	1.90077e-08	4.1668e-09	8.36961e-10	1.5419e-10	2.60056e-11	3.99923e-12	5.57462e-13	6.99042e-14	7.81367e-15	7.69998e-16	6.60102e-17	4.84198e-18	2.97489e-19	1.48757e-20	5.80937e-22	1.66058e-23	3.08763e-25	2.80049e-27	0	0	0	0	0	0	0	0	0	0	0	0
28							1.73793e-05	28	0	0	1.13927e-05	2.10125e-05	1.96604e-05	1.24606e-05	6.02702e-06	2.37626e-06	7.96328e-07	2.33418e-07	6.10665e-08	1.44629e-08	3.13028e-09	6.22525e-10	1.14001e-10	1.92114e-11	2.97066e-12	4.19489e-13	5.37545e-14	6.20248e-15	6.38482e-16	5.7993e-17	4.58625e-18	3.10608e-19	1.76359e-20	8.15731e-22	2.94954e-23	7.81378e-25	1.34779e-26	1.13513e-28	0	0	0	0	0	0	0	0	0	0	0
29							1.46583e-05	29	0	0	9.78213e-06	1.78894e-05	1.65811e-05	1.03996e-05	4.97235e-06	1.93581e-06	6.39942e-07	1.84901e-07	4.76678e-08	1.11284e-08	2.3769e-09	4.6748e-10	8.4934e-11	1.42616e-11	2.20916e-12	3.14524e-13	4.09415e-14	4.84052e-15	5.15716e-16	4.90547e-17	4.12017e-18	3.01534e-19	1.89138e-20	9.95431e-22	4.27153e-23	1.43415e-24	3.53094e-26	5.6654e-28	4.44242e-30	0	0	0	0	0	0	0	0	0	0
30							1.2441e-05	30	0	0	8.44036e-06	1.53136e-05	1.40692e-05	8.73849e-06	4.13336e-06	1.59028e-06	5.19023e-07	1.47932e-07	3.76021e-08	8.65536e-09	1.82404e-09	3.54511e-10	6.38103e-11	1.06526e-11	1.64803e-12	2.35637e-13	3.10045e-14	3.73321e-15	4.08574e-16	4.0321e-17	3.55485e-18	2.76926e-19	1.88103e-20	1.09589e-21	5.36121e-23	2.14014e-24	6.6898e-26	1.53471e-27	2.29638e-29	1.68062e-31	0	0	0	0	0	0	0	0	0
31							1.06206e-05	31	0	0	7.31608e-06	1.31754e-05	1.20056e-05	7.38917e-06	3.46014e-06	1.31663e-06	4.24576e-07	1.19463e-07	2.99581e-08	6.80169e-09	1.4143e-09	2.7151e-10	4.83652e-11	8.01361e-12	1.23517e-12	1.76786e-13	2.34165e-14	2.85696e-15	3.19201e-16	3.24349e-17	2.97355e-18	2.43676e-19	1.76549e-20	1.11605e-21	6.05532e-23	2.76072e-24	1.0278e-25	2.99859e-27	6.42537e-29	8.98704e-31	6.15289e-33	0	0	0	0	0	0	0	0
32							9.11578e-06	32	0	0	6.36893e-06	1.139e-05	1.0299e-05	6.28502e-06	2.91556e-06	1.098e-06	3.50103e-07	9.73181e-08	2.40925e-08	5.39782e-09	1.10765e-09	2.09989e-10	3.69929e-11	6.07543e-12	9.31134e-13	1.33052e-13	1.76807e-14	2.17653e-15	2.46971e-16	2.56769e-17	2.42908e-18	2.07427e-19	1.58412e-20	1.07019e-21	6.31193e-23	3.19718e-24	1.36173e-25	4.7393e-27	1.29348e-28	2.59471e-30	3.3999e-32	2.18223e-34	0	0	0	0	0	0	0
33							7.86377e-06	33	0	0	5.56692e-06	9.89059e-06	8.87884e-06	5.3753e-06	2.47171e-06	9.21883e-07	2.90853e-07	7.99273e-08	1.95469e-08	4.3239e-09	8.7589e-10	1.63978e-10	2.85553e-11	4.64399e-12	7.06629e-13	1.00587e-13	1.33719e-14	1.65497e-15	1.89887e-16	2.00932e-17	1.94901e-18	1.72092e-19	1.37221e-20	9.78999e-22	6.18181e-23	3.40967e-24	1.6161e-25	6.44481e-27	2.10148e-28	5.3771e-30	1.01191e-31	1.24473e-33	7.50511e-36	0	0	0	0	0	0
34							6.81581e-06	34	0	0	4.88454e-06	8.6248e-06	7.69012e-06	4.62094e-06	2.10739e-06	7.78907e-07	2.43317e-07	6.61471e-08	1.59907e-08	3.49439e-09	6.99047e-10	1.29254e-10	2.22446e-11	3.57999e-12	5.40169e-13	7.64652e-14	1.01451e-14	1.25859e-15	1.45482e-16	1.55985e-17	1.54307e-18	1.39977e-19	1.1563e-20	8.62906e-22	5.76428e-23	3.4096e-24	1.76258e-25	7.83406e-27	2.93131e-28	8.97362e-30	2.15698e-31	3.81562e-33	4.41465e-35	2.50524e-37	0	0	0	0	0
35							5.93371e-06	35	0	0	4.30132e-06	7.55087e-06	6.68968e-06	3.99162e-06	1.80637e-06	6.61994e-07	2.04878e-07	5.5135e-08	1.31836e-08	2.84771e-09	5.62845e-10	1.02809e-10	1.74852e-11	2.78352e-12	4.16109e-13	5.84946e-14	7.7306e-15	9.58904e-16	1.11317e-16	1.20477e-17	1.20996e-18	1.12153e-19	9.53571e-21	7.38541e-22	5.16932e-23	3.24006e-24	1.79904e-25	8.73413e-27	3.64768e-28	1.28316e-29	3.69505e-31	8.35949e-33	1.39262e-34	1.51829e-36	8.12367e-39	0	0	0	0
36							5.18727e-06	36	0	0	3.8007e-06	6.63545e-06	5.84335e-06	3.46365e-06	1.55609e-06	5.6574e-07	1.73563e-07	4.62644e-08	1.09489e-08	2.33906e-09	4.56989e-10	8.24899e-11	1.38656e-11	2.18287e-12	3.23096e-13	4.50552e-14	5.92187e-15	7.32896e-16	8.52189e-17	9.2798e-18	9.42506e-19	8.88566e-20	7.73362e-21	6.17577e-22	4.49371e-23	2.95596e-24	1.74186e-25	9.09652e-27	4.15552e-28	1.6338e-29	5.41329e-31	1.46901e-32	3.13359e-34	4.92481e-36	5.06811e-38	2.56106e-40	0	0	0
37							4.5525e-06	37	0	0	3.36923e-06	5.85166e-06	5.1239e-06	3.01834e-06	1.34679e-06	4.85988e-07	1.47876e-07	3.90649e-08	9.15547e-09	1.93557e-09	3.73999e-10	6.67404e-11	1.10896e-11	1.72638e-12	2.52903e-13	3.49558e-14	4.56353e-15	5.62535e-16	6.53695e-17	7.14227e-18	7.31157e-19	6.98334e-20	6.19267e-21	5.07077e-22	3.81052e-23	2.60985e-24	1.61644e-25	8.97174e-27	4.41478e-28	1.90113e-29	7.04914e-31	2.2037e-32	5.64529e-34	1.13735e-35	1.68909e-37	1.64342e-39	7.85579e-42	0	0
38							4.01015e-06	38	0	0	2.99594e-06	5.17776e-06	4.50951e-06	2.64085e-06	1.17079e-06	4.19508e-07	1.26664e-07	3.318e-08	7.70518e-09	1.61292e-09	3.08387e-10	5.44287e-11	8.94262e-12	1.37674e-12	1.99564e-13	2.7324e-14	3.53968e-15	4.33968e-16	5.03034e-17	5.50159e-18	5.6604e-19	5.45838e-20	4.91197e-21	4.10477e-22	3.16796e-23	2.24428e-24	1.44944e-25	8.46762e-27	4.43443e-28	2.05963e-29	8.37497e-31	2.93349e-32	8.66709e-34	2.09932e-35	4.00097e-37	5.62364e-39	5.18104e-41	2.34627e-43	0
39							3.54473e-06	39	0	0	2.6718e-06	4.59604e-06	3.98256e-06	2.31935e-06	1.02203e-06	3.63779e-07	1.09041e-07	2.83374e-08	6.52389e-09	1.35292e-09	2.56098e-10	4.4725e-11	7.26857e-12	1.10681e-12	1.58738e-13	2.15215e-14	2.76443e-15	3.36702e-16	3.88701e-17	4.24682e-18	4.3806e-19	4.2524e-20	3.86984e-21	3.28697e-22	2.59298e-23	1.88943e-24	1.26401e-25	7.71071e-27	4.25593e-28	2.10642e-29	9.24954e-31	3.55716e-32	1.17888e-33	3.29689e-35	7.5622e-37	1.36543e-38	1.81908e-40	1.58923e-42	6.82784e-45
40							3.14365e-06	40	0	0	2.38936e-06	4.09199e-06	3.52874e-06	2.04429e-06	8.95675e-07	3.16812e-07	9.43142e-08	2.43272e-08	5.55514e-09	1.14187e-09	2.14104e-10	3.70159e-11	5.95276e-12	8.96779e-13	1.2726e-13	1.70811e-14	2.17434e-15	2.62858e-16	3.01828e-17	3.28871e-18	3.3938e-19	3.30795e-20	3.0351e-21	2.61103e-22	2.09674e-23	1.56397e-24	1.0777e-25	6.81916e-27	3.93535e-28	2.05543e-29	9.62947e-31	4.00377e-32	1.45848e-33	4.58013e-35	1.21423e-36	2.64126e-38	4.52463e-40	5.72148e-42	4.7465e-44
41							2.79665e-06	41	0	0	2.14243e-06	3.65368e-06	3.13638e-06	1.80796e-06	7.8785e-07	2.77028e-07	8.19392e-08	2.09865e-08	4.75554e-09	9.69379e-10	1.80131e-10	3.08446e-11	4.91046e-12	7.32093e-13	1.0281e-13	1.36601e-14	1.72259e-15	2.06552e-16	2.35658e-17	2.5571e-18	2.63519e-19	2.57333e-20	2.37422e-21	2.06234e-22	1.67983e-23	1.27732e-24	9.0225e-26	5.88836e-27	3.52936e-28	1.92977e-29	9.55191e-31	4.24205e-32	1.6725e-33	5.77918e-35	1.72215e-36	4.33398e-38	8.95286e-40	1.45704e-41	1.75112e-43
42							2.49532e-06	42	0	0	1.92588e-06	3.27122e-06	2.79589e-06	1.60411e-06	6.95437e-07	2.43169e-07	7.14866e-08	1.81878e-08	4.09152e-09	8.27469e-10	1.52455e-10	2.58681e-11	4.07856e-12	6.01979e-13	8.36763e-14	1.1006e-14	1.37463e-15	1.63406e-16	1.85086e-17	1.99769e-18	2.05271e-19	2.00444e-20	1.85539e-21	1.62294e-22	1.33667e-23	1.03238e-24	7.444e-26	4.98657e-27	3.08666e-28	1.755e-29	9.10457e-31	4.27679e-32	1.803e-33	6.75003e-35	2.21548e-36	6.27314e-38	1.50061e-39	2.94762e-41	4.56331e-43
43							2.23272e-06	43	0	0	1.7354e-06	2.93642e-06	2.49939e-06	1.42758e-06	6.15904e-07	2.14222e-07	6.26144e-08	1.58306e-08	3.53691e-09	7.09992e-10	1.2976e-10	2.1827e-11	3.40977e-12	4.98418e-13	6.85943e-14	8.93255e-15	1.10489e-15	1.30163e-16	1.46276e-17	1.56892e-18	1.60536e-19	1.56497e-20	1.45043e-21	1.27458e-22	1.05855e-23	8.27809e-25	6.07095e-26	4.15676e-27	2.6443e-28	1.55455e-29	8.39589e-31	4.13813e-32	1.84721e-33	7.40214e-35	2.63486e-36	8.22512e-38	2.21576e-39	5.04453e-41	9.43395e-43
44							2.0031e-06	44	0	0	1.56736e-06	2.64243e-06	2.24032e-06	1.27417e-06	5.47186e-07	1.89368e-07	5.50487e-08	1.38352e-08	3.07115e-09	6.12168e-10	1.1103e-10	1.85233e-11	2.86834e-12	4.15399e-13	5.66201e-14	7.30132e-15	8.9442e-16	1.04402e-16	1.16351e-17	1.2392e-18	1.26129e-19	1.22578e-20	1.13554e-21	1.00041e-22	8.3578e-24	6.59937e-25	4.90676e-26	3.42136e-27	2.22736e-28	1.34731e-29	7.53232e-31	3.86919e-32	1.81412e-33	7.70513e-35	2.93854e-36	9.9577e-38	2.96006e-39	7.59581e-41	1.6478e-42
45							1.80167e-06	45	0	0	1.41871e-06	2.38351e-06	2.01324e-06	1.14039e-06	4.8759e-07	1.67943e-07	4.85685e-08	1.21381e-08	2.67797e-09	5.30253e-10	9.54806e-11	1.58054e-11	2.42707e-12	3.48384e-13	4.70463e-14	6.00908e-15	7.29104e-16	8.43179e-17	9.31574e-18	9.84636e-19	9.96039e-20	9.6387e-21	8.91165e-22	7.85695e-23	6.58894e-24	5.24017e-25	3.9389e-26	2.78793e-27	1.85055e-28	1.14688e-29	6.60464e-31	3.51567e-32	1.71972e-33	7.67959e-35	3.10726e-36	1.12916e-37	3.64692e-39	1.03355e-40	2.5293e-42
46							1.62443e-06	46	0	0	1.28687e-06	2.15484e-06	1.81358e-06	1.02334e-06	4.35722e-07	1.49401e-07	4.29949e-08	1.06881e-08	2.34443e-09	4.61296e-10	8.24979e-11	1.35557e-11	2.06512e-12	2.93926e-13	3.93392e-14	4.97834e-15	5.98388e-16	6.85615e-17	7.50813e-18	7.8721e-19	7.90884e-20	7.61335e-21	7.01634e-22	6.18078e-23	5.19322e-24	4.15086e-25	3.14641e-26	2.25414e-27	1.5206e-28	9.61959e-30	5.68207e-31	3.11887e-32	1.58255e-33	7.38022e-35	3.14258e-36	1.21269e-37	4.20389e-39	1.29554e-40	3.50434e-42
47							1.46802e-06	47	0	0	1.16965e-06	1.95233e-06	1.63753e-06	9.20607e-07	3.90427e-07	1.33296e-07	3.81822e-08	9.44384e-09	2.06018e-09	4.02956e-10	7.15995e-11	1.16828e-11	1.7664e-12	2.49387e-13	3.30936e-14	4.15068e-15	4.94347e-16	5.61223e-17	6.09123e-18	6.33339e-19	6.31604e-20	6.04336e-21	5.54549e-22	4.87435e-23	4.09665e-24	3.28445e-25	2.50507e-26	1.81193e-27	1.2386e-28	7.97216e-30	4.81198e-31	2.712e-32	1.42043e-33	6.87806e-35	3.06139e-36	1.24437e-37	4.58469e-39	1.51777e-40	4.46792e-42
48							1.32961e-06	48	0	0	1.06517e-06	1.77252e-06	1.48187e-06	8.30173e-07	3.50744e-07	1.19259e-07	3.40107e-08	8.37185e-09	1.81685e-09	3.53361e-10	6.24037e-11	1.01149e-11	1.51843e-12	2.12736e-13	2.79998e-14	3.48172e-15	4.10995e-16	4.62397e-17	4.974e-18	5.12779e-19	5.07402e-20	4.82257e-21	4.40224e-22	3.85645e-23	3.23738e-24	2.59907e-25	1.99065e-26	1.4504e-27	1.00212e-28	6.54336e-30	4.02267e-31	2.31914e-32	1.24844e-33	6.24598e-35	2.88928e-36	1.22869e-37	4.77246e-39	1.68056e-40	5.31857e-42
49							1.2068e-06	49	0	0	9.71829e-07	1.61248e-06	1.34386e-06	7.50336e-07	3.1587e-07	1.06985e-07	3.0382e-08	7.44468e-09	1.60768e-09	3.11011e-10	5.46066e-11	8.79561e-12	1.31143e-12	1.82396e-13	2.38199e-14	2.93759e-15	3.43789e-16	3.83385e-17	4.08773e-18	4.17799e-19	4.10093e-20	3.86976e-21	3.51149e-22	3.06277e-23	2.5649e-24	2.0589e-25	1.58076e-26	1.15784e-27	8.0673e-29	5.32988e-30	3.32755e-31	1.9559e-32	1.07811e-33	5.54903e-35	2.65455e-36	1.17425e-37	4.77586e-39	1.77443e-40	5.978e-42
50							1.09756e-06	50	0	0	8.88258e-07	1.4697e-06	1.2212e-06	6.79663e-07	2.85134e-07	9.62163e-08	2.72148e-08	6.63979e-09	1.42716e-09	2.74691e-10	4.79648e-11	7.67987e-12	1.13771e-12	1.57139e-13	2.03693e-14	2.49227e-15	2.89261e-16	3.19819e-17	3.38043e-18	3.42545e-19	3.33469e-20	3.12299e-21	2.81536e-22	2.44289e-23	2.03867e-24	1.6341e-25	1.2557e-26	9.22951e-28	6.47152e-29	4.31613e-30	2.72934e-31	1.63084e-32	9.17399e-34	4.83946e-35	2.38388e-36	1.09149e-37	4.62159e-39	1.79944e-40	6.4013e-42
51							1.00014e-06	51	0	0	8.13272e-07	1.34201e-06	1.11191e-06	6.16937e-07	2.57967e-07	8.67413e-08	2.44413e-08	5.93861e-09	1.27078e-09	2.43415e-10	4.22821e-11	6.7318e-12	9.91183e-13	1.36e-13	1.75046e-14	2.12564e-15	2.4475e-16	2.68365e-17	2.81252e-18	2.82578e-19	2.72812e-20	2.53504e-21	2.26936e-22	1.95759e-23	1.62651e-24	1.30034e-25	9.98724e-27	7.35439e-28	5.17992e-29	3.4802e-30	2.22384e-31	1.34723e-32	7.71146e-34	4.15538e-35	2.09977e-36	9.90822e-38	4.34603e-39	1.76307e-40	6.57769e-42
52							9.13077e-07	52	0	0	7.45851e-07	1.22758e-06	1.0143e-06	5.61126e-07	2.33892e-07	7.83801e-08	2.20051e-08	5.32573e-09	1.13481e-09	2.16377e-10	3.73997e-11	5.92259e-12	8.66986e-13	1.18216e-13	1.51134e-14	1.82208e-15	2.08199e-16	2.26465e-17	2.35382e-18	2.34513e-19	2.24535e-20	2.06986e-21	1.83937e-22	1.57653e-23	1.30315e-24	1.03809e-25	7.95935e-27	5.86363e-28	4.14165e-29	2.79789e-30	1.80281e-31	1.1047e-32	6.41707e-34	3.52173e-35	1.81944e-36	8.81467e-38	3.98796e-39	1.67724e-40	6.52472e-42
53							8.35082e-07	53	0	0	6.85111e-07	1.12482e-06	9.26936e-07	5.11348e-07	2.125e-07	7.09814e-08	1.98588e-08	4.78832e-09	1.01619e-09	1.92917e-10	3.3188e-11	5.22891e-12	7.61234e-13	1.0318e-13	1.31068e-14	1.56935e-15	1.78014e-16	1.92144e-17	1.98112e-18	1.95765e-19	1.85897e-20	1.69996e-21	1.49924e-22	1.27624e-23	1.04885e-24	8.3182e-26	6.36016e-27	4.68159e-28	3.31124e-29	2.24539e-30	1.45614e-31	9.0059e-33	5.29638e-34	2.95249e-35	1.55488e-36	7.70821e-38	3.58341e-39	1.55572e-40	6.27906e-42
54							7.65063e-07	54	0	0	6.30286e-07	1.03234e-06	8.48565e-07	4.66848e-07	1.93447e-07	6.44172e-08	1.79625e-08	4.31565e-09	9.12366e-10	1.72489e-10	2.95412e-11	4.63184e-12	6.70791e-13	9.04084e-14	1.14147e-14	1.35782e-15	1.52947e-16	1.6387e-17	1.67655e-18	1.64348e-19	1.54803e-20	1.40428e-21	1.22894e-22	1.03869e-23	8.4826e-25	6.69294e-26	5.09866e-27	3.74572e-28	2.64941e-29	1.80067e-30	1.17325e-31	7.30982e-33	4.34295e-34	2.45325e-35	1.31346e-36	6.643e-38	3.16263e-39	1.41195e-40	5.88707e-42
55							7.02076e-07	55	0	0	5.80709e-07	9.4895e-07	7.78119e-07	4.26979e-07	1.76436e-07	5.85786e-08	1.62826e-08	3.89872e-09	8.21204e-10	1.54642e-10	2.63719e-11	4.11593e-12	5.93117e-13	7.95112e-14	9.98083e-15	1.17988e-15	1.32021e-16	1.4045e-17	1.42625e-18	1.3873e-19	1.29638e-20	1.16667e-21	1.01307e-22	8.49948e-24	6.89499e-25	5.40928e-26	4.10245e-27	3.00506e-28	2.12314e-29	1.44429e-30	9.44018e-32	5.91468e-33	3.54315e-34	2.02373e-35	1.09887e-36	5.65486e-38	2.74881e-39	1.25775e-40	5.39678e-42
56							6.453e-07	56	0	0	5.35798e-07	8.73622e-07	7.14669e-07	3.91183e-07	1.61214e-07	5.33727e-08	1.47905e-08	3.52992e-09	7.40922e-10	1.38999e-10	2.36081e-11	3.66848e-12	5.26142e-13	7.01735e-14	8.76029e-15	1.02947e-15	1.14461e-16	1.20946e-17	1.21941e-18	1.17724e-19	1.0916e-20	9.74695e-22	8.39809e-23	6.99318e-24	5.63361e-25	4.39247e-26	3.31431e-27	2.41862e-28	1.70512e-29	1.15957e-30	7.59252e-32	4.77621e-33	2.87973e-34	1.65985e-35	9.12089e-37	4.76418e-38	2.35821e-39	1.10257e-40	4.85226e-42
57							5.94026e-07	57	0	0	4.95044e-07	8.0545e-07	6.57411e-07	3.58977e-07	1.47564e-07	4.87203e-08	1.34619e-08	3.20282e-09	6.70019e-10	1.25246e-10	2.11901e-11	3.27903e-12	4.68174e-13	6.21395e-14	7.7168e-15	9.01745e-16	9.96535e-17	1.0462e-17	1.04758e-18	1.00406e-19	9.24048e-21	8.1876e-22	7.00029e-23	5.78532e-24	4.62726e-25	3.5843e-26	2.68929e-27	1.95374e-28	1.37318e-29	9.32534e-31	6.10898e-32	3.85293e-33	2.33439e-34	1.3554e-35	7.52224e-37	3.97945e-38	2.00095e-39	9.53368e-41	4.29035e-42
58							5.47635e-07	58	0	0	4.58001e-07	7.43646e-07	6.05644e-07	3.29945e-07	1.35296e-07	4.45531e-08	1.22761e-08	2.91198e-09	6.07229e-10	1.1312e-10	1.90679e-11	2.93891e-12	4.17819e-13	5.52002e-14	6.82095e-15	7.92792e-16	8.71086e-17	9.08861e-18	9.04091e-19	8.60528e-20	7.86212e-21	6.91423e-22	5.86677e-23	4.81206e-24	3.82085e-25	2.93956e-26	2.19218e-27	1.58452e-28	1.10941e-29	7.51645e-31	4.92091e-32	3.10764e-33	1.88926e-34	1.1032e-35	6.17254e-37	3.30065e-38	1.6822e-39	8.14794e-41	3.73938e-42
59							5.05587e-07	59	0	0	4.24277e-07	6.87521e-07	5.58757e-07	3.03724e-07	1.2425e-07	4.08126e-08	1.12153e-08	2.65274e-09	5.51478e-10	1.02397e-10	1.71996e-11	2.64093e-12	3.73924e-13	4.91841e-14	6.0488e-15	6.9946e-16	7.64324e-17	7.92781e-18	7.83671e-19	7.40948e-20	6.72227e-21	5.86887e-22	4.94278e-23	4.02395e-24	3.17169e-25	2.42313e-26	1.79551e-27	1.29058e-28	8.99552e-30	6.07529e-31	3.97093e-32	2.50804e-33	1.52792e-34	8.95957e-36	5.04559e-37	2.72219e-38	1.40342e-39	6.89522e-41	3.2193e-42
60							4.67409e-07	60	0	0	3.93528e-07	6.36469e-07	5.16218e-07	2.79999e-07	1.14283e-07	3.74481e-08	1.02643e-08	2.42113e-09	5.01852e-10	9.289e-11	1.55503e-11	2.37904e-12	3.35535e-13	4.39499e-14	5.38072e-15	6.19186e-16	6.73072e-17	6.94218e-18	6.82127e-19	6.40828e-20	5.7748e-21	5.00625e-22	4.18571e-23	3.38255e-24	2.64667e-25	2.00771e-26	1.47782e-27	1.05591e-28	7.32264e-30	4.92623e-31	3.21181e-32	2.02674e-33	1.23579e-34	7.26725e-36	4.11297e-37	2.23517e-38	1.16354e-39	5.78703e-41	2.74264e-42
61							4.3269e-07	61	0	0	3.65448e-07	5.89959e-07	4.77558e-07	2.58493e-07	1.05274e-07	3.44158e-08	9.40978e-09	2.21373e-09	4.57572e-10	8.44395e-11	1.40901e-11	2.14821e-12	3.01855e-13	3.93805e-14	4.80059e-15	5.49873e-16	5.94753e-17	6.1016e-18	5.96103e-19	5.56595e-20	4.98332e-21	4.29078e-22	3.56223e-23	2.85796e-24	2.22e-25	1.67206e-26	1.22239e-27	8.67928e-29	5.98591e-30	4.00882e-31	2.6051e-32	1.64086e-33	1.00031e-34	5.89202e-36	3.34668e-37	1.82918e-38	9.59841e-40	4.82382e-41	2.31595e-42
62							4.01063e-07	62	0	0	3.3977e-07	5.47522e-07	4.42368e-07	2.38967e-07	9.7116e-08	3.16776e-08	8.64053e-09	2.02761e-09	4.1797e-10	7.69094e-11	1.2794e-11	1.94417e-12	2.72216e-13	3.53786e-14	4.29508e-15	4.89803e-16	5.27269e-17	5.38172e-18	5.22902e-19	4.85397e-20	4.31893e-21	3.69441e-22	3.04619e-23	2.42674e-24	1.87158e-25	1.39963e-26	1.01617e-27	7.16819e-29	4.91474e-30	3.27492e-31	2.11978e-32	1.33163e-33	8.10846e-35	4.77846e-36	2.72055e-37	1.49342e-38	7.88734e-40	3.99859e-41	1.94119e-42
63							3.72211e-07	63	0	0	3.16254e-07	5.08743e-07	4.10285e-07	2.21208e-07	8.97157e-08	2.92006e-08	7.94663e-09	1.86024e-09	3.82475e-10	7.01835e-11	1.16407e-11	1.76332e-12	2.46059e-13	3.18628e-14	3.85314e-15	4.37559e-16	4.689e-17	4.76272e-18	4.60346e-19	4.24946e-20	3.75861e-21	3.19491e-22	2.61696e-23	2.07053e-24	1.58567e-25	1.17746e-26	8.48946e-28	5.94883e-29	4.05362e-30	2.68642e-31	1.731e-32	1.08373e-33	6.58557e-35	3.87907e-36	2.21116e-37	1.21751e-38	6.46269e-40	3.29992e-41	1.61715e-42
64							3.45849e-07	64	0	0	2.9469e-07	4.73257e-07	3.80992e-07	2.05032e-07	8.29913e-08	2.69557e-08	7.31952e-09	1.70943e-09	3.50592e-10	6.41625e-11	1.06119e-11	1.60262e-12	2.2291e-13	2.87649e-14	3.46554e-15	3.91966e-16	4.18231e-17	4.2284e-18	4.06669e-19	3.73398e-20	3.28391e-21	2.77457e-22	2.25821e-23	1.77484e-24	1.34993e-25	9.95453e-27	7.12753e-28	4.96088e-29	3.35894e-30	2.21317e-31	1.41894e-32	8.84808e-34	5.36175e-35	3.15378e-36	1.79803e-37	9.91908e-39	5.28496e-40	2.71409e-41	1.34055e-42
65							3.21728e-07	65	0	0	2.74888e-07	4.4074e-07	3.54207e-07	1.90274e-07	7.68713e-08	2.49177e-08	6.75175e-09	1.57327e-09	3.21895e-10	5.87605e-11	9.6921e-12	1.45946e-12	2.02368e-13	2.60274e-14	3.12456e-15	3.52048e-16	3.74095e-17	3.76547e-18	3.60429e-19	3.29259e-20	2.87999e-21	2.41923e-22	1.95697e-23	1.52822e-24	1.15462e-25	8.45632e-27	6.0133e-28	4.15708e-29	2.79642e-30	1.8314e-31	1.16785e-32	7.24941e-34	4.37778e-35	2.56934e-36	1.4637e-37	8.08138e-39	4.31687e-40	2.22678e-41	1.10694e-42
66							2.99627e-07	66	0	0	2.56683e-07	4.10902e-07	3.29681e-07	1.7679e-07	7.12925e-08	2.30646e-08	6.23679e-09	1.45012e-09	2.96015e-10	5.39038e-11	8.86784e-12	1.33163e-12	1.84095e-13	2.36019e-14	2.82373e-15	3.16991e-16	3.35521e-17	3.36296e-18	3.20445e-19	2.91313e-20	2.53485e-21	2.11753e-22	1.70286e-23	1.32156e-24	9.92041e-26	7.21729e-27	5.09755e-28	3.50027e-29	2.33912e-30	1.52237e-31	9.65257e-33	5.96204e-34	3.58582e-35	2.0984e-36	1.19349e-37	6.58856e-39	3.52464e-40	1.82399e-41	9.11338e-43
67							2.79348e-07	67	0	0	2.39924e-07	3.83487e-07	3.07192e-07	1.64453e-07	6.61994e-08	2.13767e-08	5.76895e-09	1.33853e-09	2.7263e-10	4.95285e-11	8.12764e-12	1.21722e-12	1.67799e-13	2.14472e-14	2.55758e-15	2.8611e-16	3.017e-17	3.01181e-18	2.85746e-19	2.58565e-20	2.23874e-21	1.86026e-22	1.48755e-23	1.14759e-24	8.56078e-26	6.18783e-27	4.34149e-28	2.96121e-29	1.96584e-30	1.2713e-31	8.0128e-33	4.92283e-34	2.94739e-35	1.71869e-36	9.75216e-38	5.37813e-39	2.87849e-40	1.49276e-41	7.48733e-43
68							2.60718e-07	68	0	0	2.24478e-07	3.58268e-07	2.86543e-07	1.53148e-07	6.15429e-08	1.98371e-08	5.34322e-09	1.23725e-09	2.51462e-10	4.55793e-11	7.46155e-12	1.1146e-12	1.53232e-13	1.95283e-14	2.32149e-15	2.58831e-16	2.71957e-17	2.70447e-18	2.55529e-19	2.302e-20	1.9837e-21	1.63999e-22	1.30434e-23	1.0005e-24	7.41858e-26	5.32858e-27	3.71443e-28	2.51684e-29	1.65986e-30	1.06653e-31	6.68111e-33	4.08161e-34	2.43166e-35	1.41218e-36	7.98872e-38	4.39768e-39	2.35274e-40	1.22145e-41	6.14331e-43
69							2.4358e-07	69	0	0	2.10226e-07	3.35038e-07	2.67561e-07	1.42776e-07	5.72795e-08	1.84305e-08	4.95519e-09	1.14516e-09	2.32266e-10	4.20079e-11	6.86096e-12	1.02236e-12	1.40183e-13	1.78152e-14	2.11151e-15	2.34668e-16	2.45724e-17	2.43463e-18	2.29128e-19	2.05544e-20	1.76322e-21	1.45066e-22	1.14779e-23	8.75589e-25	6.45477e-26	4.60814e-27	3.19199e-28	2.14889e-29	1.40797e-30	8.98859e-32	5.59572e-33	3.39857e-34	2.01404e-35	1.16435e-36	6.56299e-38	3.60379e-39	1.92562e-40	9.9987e-42	5.03744e-43
70							2.27796e-07	70	0	0	1.97059e-07	3.13617e-07	2.50087e-07	1.33247e-07	5.33706e-08	1.71437e-08	4.60098e-09	1.0613e-09	2.14829e-10	3.87724e-11	6.31839e-12	9.39281e-13	1.28466e-13	1.62824e-14	1.92431e-15	2.13208e-16	2.22522e-17	2.19701e-18	2.05987e-19	1.8404e-20	1.57193e-21	1.28729e-22	1.0135e-23	7.69076e-25	5.63797e-26	4.00143e-27	2.75479e-28	1.84287e-29	1.19972e-30	7.60999e-32	4.70774e-33	2.84211e-34	1.67494e-35	9.63547e-37	5.40886e-38	2.96077e-39	1.5789e-40	8.19282e-42	4.13072e-43
71							2.1324e-07	71	0	0	1.84883e-07	2.9384e-07	2.33984e-07	1.24482e-07	4.9782e-08	1.59647e-08	4.27718e-09	9.84816e-10	1.98963e-10	3.58361e-11	5.82733e-12	8.64305e-13	1.17925e-13	1.49079e-14	1.75702e-15	1.94102e-16	2.01946e-17	1.98716e-18	1.85642e-19	1.65224e-20	1.40538e-21	1.14581e-22	8.97849e-24	6.77883e-25	4.94286e-26	3.48828e-27	2.3873e-28	1.58723e-29	1.0268e-30	6.47179e-32	3.97843e-33	2.38717e-34	1.39875e-35	8.00458e-37	4.473e-38	2.43951e-39	1.2975e-40	6.72291e-42	3.38919e-43
72							1.99802e-07	72	0	0	1.7361e-07	2.7556e-07	2.19126e-07	1.16409e-07	4.64831e-08	1.48831e-08	3.98074e-09	9.14948e-10	1.84505e-10	3.31668e-11	5.3821e-12	7.96515e-13	1.08423e-13	1.36726e-14	1.60718e-15	1.77049e-16	1.83651e-17	1.80133e-18	1.67703e-19	1.48708e-20	1.25991e-21	1.02286e-22	7.97884e-24	5.99502e-25	4.34891e-26	3.05244e-27	2.07709e-28	1.37276e-29	8.826e-31	5.52811e-32	3.37704e-33	2.01387e-34	1.17306e-35	6.67633e-37	3.71253e-38	2.0164e-39	1.06902e-40	5.52719e-42	2.78384e-43
73							1.87382e-07	73	0	0	1.63163e-07	2.58647e-07	2.05401e-07	1.08965e-07	4.34468e-08	1.38895e-08	3.70897e-09	8.51034e-10	1.71309e-10	3.07364e-11	4.97772e-12	7.35111e-13	9.98398e-14	1.25603e-14	1.47269e-15	1.61795e-16	1.67344e-17	1.63633e-18	1.51841e-19	1.34168e-20	1.13243e-21	9.15656e-23	7.11169e-24	5.3188e-25	3.83938e-26	2.68075e-27	1.81412e-28	1.19205e-29	7.6183e-31	4.74241e-32	2.87911e-33	1.70637e-34	9.88006e-36	5.59129e-37	3.09308e-38	1.67235e-39	8.83316e-41	4.5545e-42	2.29018e-43
74							1.7589e-07	74	0	0	1.53471e-07	2.4298e-07	1.92709e-07	1.02093e-07	4.06487e-08	1.29756e-08	3.4595e-09	7.92484e-10	1.59246e-10	2.85198e-11	4.60985e-12	6.79393e-13	9.2073e-14	1.15566e-14	1.35171e-15	1.48118e-16	1.52775e-17	1.48947e-18	1.37777e-19	1.21331e-20	1.02038e-21	8.21871e-23	6.35689e-24	4.73328e-25	3.40063e-26	2.36251e-27	1.59029e-28	1.03915e-29	6.60256e-31	4.08548e-32	2.46516e-33	1.45209e-34	8.35713e-36	4.70208e-37	2.58713e-38	1.39199e-39	7.32182e-41	3.7628e-42	1.88777e-43
75							1.65246e-07	75	0	0	1.44471e-07	2.28454e-07	1.80959e-07	9.57415e-08	3.80672e-08	1.21339e-08	3.23019e-09	7.38773e-10	1.48204e-10	2.64954e-11	4.27464e-12	6.2875e-13	8.50322e-14	1.06493e-14	1.24266e-15	1.35831e-16	1.39729e-17	1.35843e-18	1.25276e-19	1.09966e-20	9.21612e-22	7.39572e-23	5.69773e-24	4.22454e-25	3.02143e-26	2.08898e-27	1.39901e-28	9.0925e-30	5.74473e-31	3.53394e-32	2.11959e-33	1.24098e-34	7.09914e-36	3.97086e-37	2.17263e-38	1.16298e-39	6.08957e-41	3.11774e-42	1.55968e-43
76							1.55376e-07	76	0	0	1.36104e-07	2.14971e-07	1.7007e-07	8.98648e-08	3.56826e-08	1.13579e-08	3.01914e-09	6.89438e-10	1.38082e-10	2.46437e-11	3.96872e-12	5.82644e-13	7.86384e-14	9.82759e-15	1.14419e-15	1.24767e-16	1.28022e-17	1.24123e-18	1.14136e-19	9.98775e-21	8.34297e-22	6.67137e-23	5.12024e-24	3.78102e-25	2.69254e-26	1.85302e-27	1.23492e-28	7.98451e-30	5.01728e-31	3.06895e-32	1.82994e-33	1.06501e-34	6.05602e-36	3.36741e-37	1.83198e-38	9.7541e-40	5.08274e-41	2.59141e-42	1.29201e-43
77							1.46214e-07	77	0	0	1.2832e-07	2.02444e-07	1.59968e-07	8.44217e-08	3.34776e-08	1.06415e-08	2.82467e-09	6.44062e-10	1.28791e-10	2.29475e-11	3.68913e-12	5.40602e-13	7.28226e-14	9.08211e-15	1.0551e-15	1.14787e-16	1.17493e-17	1.13617e-18	1.04186e-19	9.09e-21	7.56903e-22	6.03201e-23	4.61278e-24	3.3931e-25	2.40631e-26	1.64874e-27	1.09362e-28	7.03577e-30	4.39794e-31	2.67536e-32	1.58617e-33	9.17737e-35	5.18772e-36	2.8676e-37	1.55108e-38	8.21319e-40	4.25806e-41	2.16115e-42	1.0734e-43
78							1.37703e-07	78	0	0	1.21072e-07	1.90795e-07	1.50588e-07	7.93749e-08	3.14364e-08	9.97941e-09	2.64525e-09	6.02277e-10	1.20252e-10	2.13917e-11	3.43321e-12	5.02207e-13	6.75238e-14	8.40461e-15	9.74348e-16	1.05767e-16	1.08004e-17	1.04181e-18	9.52777e-20	8.28914e-21	6.88123e-22	5.46611e-23	4.16555e-24	3.05278e-25	2.15639e-26	1.47126e-27	9.71506e-29	6.22031e-30	3.86858e-31	2.34086e-32	1.38018e-33	7.93994e-35	4.46209e-36	2.45205e-37	1.31865e-38	6.94335e-40	3.58077e-41	1.80867e-42	8.94567e-44
79							1.29788e-07	79	0	0	1.14315e-07	1.79951e-07	1.41869e-07	7.46908e-08	2.95448e-08	9.36686e-09	2.47954e-09	5.63751e-10	1.12394e-10	1.99627e-11	3.19865e-12	4.67092e-13	6.26888e-14	7.78789e-15	9.01028e-16	9.75985e-17	9.94375e-18	9.56859e-19	8.72848e-20	7.57305e-21	6.26848e-22	4.9639e-23	3.77028e-24	2.7533e-25	1.93748e-26	1.31656e-27	8.65605e-29	5.51685e-30	3.41442e-31	2.05548e-32	1.20542e-33	6.89605e-35	3.85333e-36	2.10526e-37	1.12562e-38	5.89345e-40	3.02289e-41	1.5192e-42	7.48011e-44
80							1.2242e-07	80	0	0	1.08012e-07	1.69849e-07	1.33757e-07	7.0339e-08	2.77901e-08	8.79952e-09	2.32631e-09	5.28189e-10	1.05153e-10	1.86485e-11	2.98335e-12	4.34929e-13	5.82701e-14	7.2256e-15	8.34344e-16	9.01891e-17	9.16877e-18	8.80241e-19	8.00981e-20	6.9313e-21	5.72126e-22	4.51709e-23	3.42e-24	2.48903e-25	1.74516e-26	1.18128e-27	7.73454e-29	4.90786e-30	3.02334e-31	1.81107e-32	1.05659e-33	6.01198e-35	3.3406e-36	1.81474e-37	9.64724e-39	5.0224e-40	2.56193e-41	1.28084e-42	6.27643e-44
81							1.15555e-07	81	0	0	1.02127e-07	1.60429e-07	1.26202e-07	6.62922e-08	2.61607e-08	8.2735e-09	2.18447e-09	4.95325e-10	9.84728e-11	1.74384e-11	2.78549e-12	4.05431e-13	5.42261e-14	6.71215e-15	7.73598e-16	8.34563e-17	8.46646e-18	8.11003e-19	7.36229e-20	6.35493e-21	5.23146e-22	4.11858e-23	3.10878e-24	2.25517e-25	1.5757e-26	1.06261e-27	6.93004e-29	4.37884e-30	2.68536e-31	1.60098e-32	9.29357e-34	5.26036e-35	2.90708e-36	1.57043e-37	8.30118e-39	4.29718e-40	2.17983e-41	1.084e-42	5.2854e-44
82							1.09153e-07	82	0	0	9.66271e-08	1.51637e-07	1.19161e-07	6.25254e-08	2.46462e-08	7.78531e-09	2.05303e-09	4.6492e-10	9.23034e-11	1.63228e-11	2.60342e-12	3.7834e-13	5.05198e-14	6.2426e-15	7.18173e-16	7.73284e-17	7.82887e-18	7.48317e-19	6.77775e-20	5.83621e-21	4.79208e-22	3.76232e-23	2.83158e-24	2.04767e-25	1.42596e-26	9.58217e-28	6.22551e-29	3.91777e-30	2.39228e-31	1.41974e-32	8.2018e-34	4.61891e-35	2.53913e-36	1.36418e-37	7.17082e-39	3.69121e-40	1.86201e-41	9.20943e-43	4.46728e-44
83							1.03179e-07	83	0	0	9.14838e-08	1.43424e-07	1.12593e-07	5.9016e-08	2.32372e-08	7.33177e-09	1.93111e-09	4.36761e-10	8.65991e-11	1.5293e-11	2.43567e-12	3.53427e-13	4.71184e-14	5.81258e-15	6.67527e-16	7.17419e-17	7.24907e-18	6.91461e-19	6.24905e-20	5.36843e-21	4.39708e-22	3.44312e-23	2.58407e-24	1.8631e-25	1.29329e-26	8.66108e-28	5.60663e-29	3.51464e-30	2.13727e-31	1.26285e-32	7.26159e-34	4.06945e-35	2.22564e-36	1.18941e-37	6.21803e-39	3.18302e-40	1.59675e-41	7.85437e-43	3.78995e-44
84							9.75976e-08	84	0	0	8.66698e-08	1.35747e-07	1.0646e-07	5.57437e-08	2.19251e-08	6.91002e-09	1.8179e-09	4.10654e-10	8.1319e-11	1.43414e-11	2.28092e-12	3.30489e-13	4.39926e-14	5.41822e-15	6.2118e-16	6.66413e-17	6.72095e-18	6.39806e-19	5.76999e-20	4.94577e-21	4.04125e-22	3.15649e-23	2.36258e-24	1.69852e-25	1.17544e-26	7.84616e-28	5.06143e-29	3.16108e-30	1.91467e-31	1.12656e-32	6.44904e-34	3.59708e-35	1.95757e-36	1.04076e-37	5.41191e-39	2.75527e-40	1.37457e-41	6.72452e-43	3.22748e-44
85							9.238e-08	85	0	0	8.21606e-08	1.28564e-07	1.00729e-07	5.26896e-08	2.07021e-08	6.51747e-09	1.71267e-09	3.86426e-10	7.64263e-11	1.34611e-11	2.13801e-12	3.09342e-13	4.11164e-14	5.05606e-15	5.78707e-16	6.19773e-17	6.23916e-18	5.92797e-19	5.33514e-20	4.56316e-21	3.72009e-22	2.89857e-23	2.16392e-24	1.55142e-25	1.07049e-26	7.12326e-28	4.57976e-29	2.85009e-30	1.71975e-31	1.00779e-32	5.74443e-34	3.18954e-35	1.7275e-36	9.13851e-38	4.72734e-39	2.3939e-40	1.18781e-41	5.77924e-43	2.75891e-44
86							8.74982e-08	86	0	0	7.79337e-08	1.21839e-07	9.53689e-08	4.9837e-08	1.95613e-08	6.15175e-09	1.61478e-09	3.63917e-10	7.1888e-11	1.26458e-11	2.00588e-12	2.89824e-13	3.84666e-14	4.72305e-15	5.39731e-16	5.77063e-17	5.79896e-18	5.49946e-19	4.93976e-20	4.2162e-21	3.42965e-22	2.66602e-23	1.98536e-24	1.41964e-25	9.76804e-27	6.48035e-28	4.15309e-29	2.57574e-30	1.54856e-31	9.0396e-33	5.13138e-34	2.83673e-35	1.52934e-36	8.05116e-38	4.14386e-39	2.08749e-40	1.03025e-41	4.98563e-43	2.36728e-44
87							8.2927e-08	87	0	0	7.39685e-08	1.15537e-07	9.03523e-08	4.71702e-08	1.84961e-08	5.81073e-09	1.52362e-09	3.42987e-10	6.7674e-11	1.189e-11	1.88358e-12	2.7179e-13	3.60224e-14	4.41645e-15	5.03917e-16	5.37898e-17	5.39616e-18	5.10827e-19	4.57967e-20	3.90101e-21	3.16652e-22	2.45593e-23	1.82454e-24	1.30133e-25	8.92979e-27	5.90718e-28	3.77415e-29	2.33307e-30	1.39777e-31	8.12908e-33	4.5963e-34	2.53028e-35	1.35808e-36	7.11619e-38	3.64475e-39	1.82674e-40	8.96852e-42	4.31702e-43	2.03887e-44
88							7.86434e-08	88	0	0	7.02462e-08	1.09627e-07	8.56534e-08	4.46751e-08	1.75007e-08	5.49247e-09	1.43865e-09	3.23506e-10	6.37575e-11	1.11885e-11	1.77025e-12	2.55106e-13	3.37653e-14	4.13382e-15	4.70964e-16	5.01934e-17	5.02707e-18	4.75059e-19	4.2512e-20	3.6142e-21	2.9277e-22	2.26579e-23	1.67941e-24	1.19489e-25	8.1781e-27	5.39497e-28	3.43675e-29	2.11783e-30	1.26458e-31	7.32828e-33	4.12781e-34	2.26323e-35	1.20956e-36	6.30945e-38	3.21629e-39	1.60405e-40	7.83505e-42	3.75172e-43	1.76252e-44
89							7.46263e-08	89	0	0	6.67493e-08	1.04081e-07	8.12487e-08	4.2339e-08	1.65698e-08	5.1952e-09	1.35939e-09	3.05357e-10	6.01139e-11	1.05369e-11	1.66514e-12	2.39656e-13	3.16785e-14	3.87298e-15	4.40607e-16	4.68867e-17	4.68839e-18	4.42309e-19	3.95111e-20	3.3528e-21	2.71059e-22	2.09337e-23	1.54818e-24	1.09893e-25	7.50258e-27	4.9362e-28	3.13561e-29	1.92645e-30	1.14661e-31	6.62197e-33	3.7164e-34	2.02978e-35	1.08035e-36	5.611e-38	2.84719e-39	1.41319e-40	6.8685e-42	3.27208e-43	1.52918e-44
90							7.08563e-08	90	0	0	6.3462e-08	9.8873e-08	7.71167e-08	4.01499e-08	1.56986e-08	4.9173e-09	1.28539e-09	2.88435e-10	5.6721e-11	9.931e-12	1.56755e-12	2.25333e-13	2.9747e-14	3.63197e-15	4.12608e-16	4.38425e-17	4.3772e-18	4.1228e-19	3.67655e-20	3.11419e-21	2.51288e-22	1.93677e-23	1.42931e-24	1.01226e-25	6.89426e-27	4.5244e-28	2.86623e-29	1.75586e-30	1.04186e-31	5.99729e-33	3.35407e-34	1.82509e-35	9.67575e-37	5.00431e-38	2.52816e-39	1.24904e-40	6.0414e-42	2.8637e-43	1.33148e-44
91							6.73158e-08	91	0	0	6.03697e-08	9.39787e-08	7.32377e-08	3.80971e-08	1.48825e-08	4.65729e-09	1.21624e-09	2.72641e-10	5.35588e-11	9.36706e-12	1.47684e-12	2.12041e-13	2.79574e-14	3.40902e-15	3.86752e-16	4.10365e-17	4.09091e-18	3.84707e-19	3.42499e-20	2.89604e-21	2.33255e-22	1.79429e-23	1.32144e-24	9.33825e-26	6.34536e-27	4.15397e-28	2.62469e-29	1.60343e-30	9.48611e-32	5.44333e-33	3.03407e-34	1.64508e-35	8.68843e-37	4.47563e-38	2.25148e-39	1.10738e-40	5.33117e-42	2.51476e-43	1.16339e-44
92							6.39884e-08	92	0	0	5.74587e-08	8.93762e-08	6.95937e-08	3.61707e-08	1.41175e-08	4.41385e-09	1.15157e-09	2.5789e-10	5.06089e-11	8.84169e-12	1.39246e-12	1.99693e-13	2.62976e-14	3.20256e-15	3.62849e-16	3.84468e-17	3.82718e-18	3.59357e-19	3.19417e-20	2.69631e-21	2.16782e-22	1.66445e-23	1.22338e-24	8.62715e-26	5.84913e-27	3.82008e-28	2.40768e-29	1.46694e-30	8.65397e-32	4.95085e-33	2.7507e-34	1.48634e-35	7.82149e-37	4.0135e-38	2.01076e-39	9.8472e-41	4.71922e-42	2.21559e-43	1.01997e-44
93							6.08591e-08	93	0	0	5.47169e-08	8.50451e-08	6.6168e-08	3.43617e-08	1.33998e-08	4.18573e-09	1.09104e-09	2.44099e-10	4.78547e-11	8.35182e-12	1.31389e-12	1.88212e-13	2.47564e-14	3.01118e-15	3.40726e-16	3.60542e-17	3.58395e-18	3.36021e-19	2.98211e-20	2.51319e-21	2.01712e-22	1.54593e-23	1.13409e-24	7.98134e-26	5.39968e-27	3.51853e-28	2.21228e-29	1.34443e-30	7.90968e-32	4.51194e-33	2.49911e-34	1.34596e-35	7.05806e-37	3.60833e-38	1.80066e-39	8.7817e-41	4.1902e-42	1.95822e-43	8.97203e-45
94							5.79143e-08	94	0	0	5.21326e-08	8.09668e-08	6.29454e-08	3.26616e-08	1.27261e-08	3.97182e-09	1.03435e-09	2.31197e-10	4.52811e-11	7.89465e-12	1.24065e-12	1.77527e-13	2.33241e-14	2.83357e-15	3.20229e-16	3.3841e-17	3.35935e-18	3.14512e-19	2.78702e-20	2.34507e-21	1.87905e-22	1.43759e-23	1.05267e-24	7.39382e-26	4.99187e-27	3.24568e-28	2.03599e-29	1.23425e-30	7.24247e-32	4.11984e-33	2.27517e-34	1.22149e-35	6.38391e-37	3.25206e-38	1.61674e-39	7.8532e-41	3.73136e-42	1.73607e-43	7.91745e-45
95							5.51411e-08	95	0	0	4.96953e-08	7.71241e-08	5.99119e-08	3.10628e-08	1.20932e-08	3.77107e-09	9.81201e-10	2.19117e-10	4.28743e-11	7.46763e-12	1.17234e-12	1.67572e-13	2.19917e-14	2.6686e-15	3.01219e-16	3.17916e-17	3.15172e-18	2.94663e-19	2.60733e-20	2.19051e-21	1.75238e-22	1.33841e-23	9.78291e-25	6.85847e-26	4.62121e-27	2.99835e-28	1.87664e-29	1.13496e-30	6.64306e-32	3.76877e-33	2.07538e-34	1.11085e-35	5.787e-37	2.9379e-38	1.45526e-39	7.0416e-41	3.33214e-42	1.54369e-43	7.00857e-45
96							5.2528e-08	96	0	0	4.73953e-08	7.35011e-08	5.70546e-08	2.95583e-08	1.14982e-08	3.58255e-09	9.31345e-10	2.07797e-10	4.06216e-11	7.06845e-12	1.10856e-12	1.5829e-13	2.07511e-14	2.5152e-15	2.83569e-16	2.98919e-17	2.95957e-18	2.76325e-19	2.4416e-20	2.04824e-21	1.63601e-22	1.24748e-23	9.10256e-25	6.36988e-26	4.28376e-27	2.77375e-28	1.73233e-29	1.04529e-30	6.10344e-32	3.45373e-33	1.8967e-34	1.01227e-35	5.25711e-37	2.66013e-38	1.31307e-39	6.33006e-41	2.9837e-42	1.37657e-43	6.2227e-45
97							5.00642e-08	97	0	0	4.52236e-08	7.00832e-08	5.43614e-08	2.81416e-08	1.09385e-08	3.40539e-09	8.84542e-10	1.97182e-10	3.85116e-11	6.69498e-12	1.04896e-12	1.49628e-13	1.95948e-14	2.37243e-15	2.67165e-16	2.8129e-17	2.78154e-18	2.59363e-19	2.28858e-20	1.91711e-21	1.52897e-22	1.16401e-23	8.47929e-25	5.92329e-26	3.97603e-27	2.56945e-28	1.60141e-29	9.64174e-31	5.61667e-32	3.17043e-33	1.73654e-34	9.24207e-36	4.78554e-37	2.41387e-38	1.18752e-39	5.70444e-41	2.67868e-42	1.23092e-43	5.54101e-45
98							4.77397e-08	98	0	0	4.31717e-08	6.68568e-08	5.18214e-08	2.68068e-08	1.04117e-08	3.23878e-09	8.40573e-10	1.87221e-10	3.65337e-11	6.3453e-12	9.93229e-13	1.41538e-13	1.85161e-14	2.23943e-15	2.51906e-16	2.64915e-17	2.61643e-18	2.43657e-19	2.14713e-20	1.79611e-21	1.43037e-22	1.08727e-23	7.90753e-25	5.51449e-26	3.69499e-27	2.38331e-28	1.48243e-29	8.90649e-31	5.17673e-32	2.91515e-33	1.59269e-34	8.45372e-36	4.36486e-37	2.195e-38	1.07637e-39	5.15283e-41	2.41088e-42	1.10361e-43	4.94784e-45
99							4.55452e-08	99	0	0	4.12321e-08	6.38093e-08	4.94244e-08	2.55482e-08	9.91538e-09	3.082e-09	7.99238e-10	1.77866e-10	3.46782e-11	6.01764e-12	9.41063e-13	1.33974e-13	1.75091e-14	2.11542e-15	2.37698e-16	2.4969e-17	2.46313e-18	2.29098e-19	2.01623e-20	1.68432e-21	1.33945e-22	1.01664e-23	7.38229e-25	5.13974e-26	3.43792e-27	2.21345e-28	1.37412e-29	8.23891e-31	4.77837e-32	2.68466e-33	1.4632e-34	7.7464e-36	3.98869e-37	2e-38	9.77705e-40	4.66514e-41	2.17509e-42	9.92002e-44	4.43011e-45
100							4.34724e-08	100	0	0	3.93975e-08	6.09293e-08	4.71611e-08	2.43609e-08	9.4476e-09	2.93436e-09	7.60353e-10	1.69074e-10	3.29363e-11	5.71037e-12	8.92201e-13	1.26899e-13	1.65681e-14	1.9997e-15	2.24457e-16	2.3552e-17	2.32068e-18	2.15588e-19	1.89495e-20	1.58093e-21	1.2555e-22	9.51552e-24	6.89916e-25	4.79573e-26	3.20244e-27	2.0582e-28	1.27536e-29	7.63173e-31	4.41701e-32	2.47617e-33	1.34641e-34	7.11042e-36	3.65158e-37	1.82584e-38	8.89915e-40	4.23284e-41	1.96692e-42	8.93873e-44	3.97689e-45
								1	0	0	0	0	0	0	0	0	0	0	0	0	0	0	0	0	0	0	0	0	0	0
								2	0	0	0	0	0	0	0	0	0	0	0	0	0	0	0	0	0	0	0	0	0	0
								3	0	0	0	0	0	0	0	0	0	0	0	0	0	0	0	0	0	0	0	0	0	0
								4	0	0	0	0	0	0	0	0	0	0	0	0	0	0	0	0	0	0	0	0	0	0
								5	0	0	0	0	0	0	0	0	0	0	0	0	0	0	0	0	0	0	0	0	0	0
								6	0	0	0	0	0	0	0	0	0	0	0	0	0	0	0	0	0	0	0	0	0	0
								7	0	0	0	0	0	0	0	0	0	0	0	0	0	0	0	0	0	0	0	0	0	0
								8	0	0	0	0	0	0	0	0	0	0	0	0	0	0	0	0	0	0	0	0	0	0
								9	0	0	0	0	0	0	0	0	0	0	0	0	0	0	0	0	0	0	0	0	0	0
								10	0	0	0	0	0	0	0	0	0	0	0	0	0	0	0	0	0	0	0	0	0	0
								11	0	0	0	0	0	0	0	0	0	0	0	0	0	0	0	0	0	0	0	0	0	0
								12	0	0	0	0	0	0	0	0	0	0	0	0	0	0	0	0	0	0	0	0	0	0
[truncated: 61 more columns]
